# Supplementary material
Source: publisher figshare collection journal article supplement (https://gsapubs.figshare.com/ndownloader/files/34844130)
Supplement: Supplementary file 1 [file 34844130]

**SUPPLEMENTAL FILE 2**

**FOR:**

**Rapid postorogenic cooling of the Paleoproterozoic Cape Smith foreland thrust belt and footwall  
Archean basement, Trans-Hudson orogen, Canada**

*Skipton, D.R., St-Onge, M.R., Kellett, D.A., Joyce, N.L., and Smith, S.*

*in* Whitmeyer, S.J., Williams, M.L., Kellett, D.A., and Tikoff, B., eds., *Laurentia:  
Turning Points in the Evolution of a Continent*: Geological Society of America  
Memoir 220, [https://doi.org/10.1130/2022.1220\(06\)](https://doi.org/10.1130/2022.1220(06)).

## CONTENTS

|                                                                             |    |
|-----------------------------------------------------------------------------|----|
| $^{40}\text{Ar}/^{39}\text{Ar}$ step-heating methodology                    | 3  |
| $^{40}\text{Ar}/^{39}\text{Ar}$ sample descriptions and gas-release spectra | 6  |
| Cape Smith belt: Povungnituk Group                                          | 6  |
| Cape Smith belt: Spartan Group                                              | 22 |
| Cape Smith belt: Watts Group                                                | 29 |
| Superior craton (CSB shear zones)                                           | 30 |
| Superior craton (south of CSB)                                              | 38 |
| Superior craton (~450 km south of CSB)                                      | 52 |
| References                                                                  | 61 |

### **$^{40}\text{Ar}/^{39}\text{Ar}$ step-heating methodology**

Thirty-eight samples were processed for  $^{40}\text{Ar}/^{39}\text{Ar}$  analysis of hornblende, biotite and muscovite using standard preparation techniques, including hand-picking of the most pristine, unaltered grains in the size range 0.25 to 0.50 mm. Mineral separates were packed in aluminum foil packets and loaded into vertical tubes, which were arranged radially within an aluminum can (see Kellett and Joyce (2014) for further details). For cases in which two mineral phases were targeted from an individual sample, those phases were loaded together in the same packet. Packets of flux monitor PP-20 hornblende (Hb3gr-equivalent) were interspersed among the sample packets in the irradiation can. The samples filled two cans, which were irradiated separately (batch numbers: GSC RAD#46 and GSC RAD#48) in the research reactor at McMaster University (Ontario, Canada) in the high flux position 5c for 240 MWh.

Laser  $^{40}\text{Ar}/^{39}\text{Ar}$  step-heating analysis was conducted at the Geological Survey of Canada noble gas mass spectrometry laboratory (Ottawa, Ontario, Canada). Fifty-eight  $^{40}\text{Ar}/^{39}\text{Ar}$  step-heating analyses were completed in total, on 17 hornblende samples (18 aliquots), 30 biotite samples (32 aliquots) and 8 muscovite samples. Of these, paired biotite–hornblende and biotite–muscovite analyses were conducted in 11 and 6 samples, respectively. Following irradiation, each grain (aliquot) was loaded individually into 1.5 mm-diameter holes in a copper planchet, which was placed in the sample chamber of a noble gas extraction line and the system was evacuated. A MerchanteK MIR-10 10W CO<sub>2</sub> laser equipped with a 2 x 2 mm flat-field lens was used to incrementally heat each aliquot in steps of increasing temperature. After each heating step, the released Ar gas was cleaned in the extraction line over getters for ten minutes (to remove nitrogen, oxygen, hydrocarbons, water, hydrogen and other active gases), and then analysed via mass spectrometry.

A VG3600 gas source mass spectrometer equipped with a secondary electron multiplier system was used for isotopic analysis of sample gas following data collection protocols detailed in Villeneuve and MacIntyre (1997) and Villeneuve et al. (2000). Blank measurements were interspersed between aliquots and the running average blank was used to correct data. Ranges of blank values are provided in the footnotes of Supplementary File 1, together with nucleogenic interference correction factors. A decay constant  $^{40}\text{K}$   $\lambda_{\text{total}}$  of  $5.543 \times 10^{-10}/\text{a}$  and atmospheric Ar composition of  $^{40}\text{Ar}/^{36}\text{Ar} = 295.5$  (Steiger and Jäger, 1977) were used to calculate ages. Error

analysis on individual gas-release steps followed the numerical error analysis routines of Scaillet (2000). Corrected argon isotopic data are provided in Supplementary File 1, and step heat gas-release spectra are presented herein. Each plotted gas-release spectrum contains step-heating data from up to two aliquots per sample. Nearly all data are highly radiogenic, plotting on or near the radiogenic  $^{39}\text{Ar}/^{40}\text{Ar}$  axis (refer to inverse isochron ratios in Supplementary File 1).

Neutron flux gradients were determined by analyzing the PP-20 hornblende flux monitors included in each sample packet and interpolating a linear fit against the calculated J-factor and sample position. As J-factors were calculated using a PP-20 hornblende age of  $1072 \pm 11$  Ma (Roddick, 1983) during the original data reduction in 2004, apparent ages have been corrected to the most recently determined PP-20 hornblende age ( $1073.6 \pm 5.3$  Ma; Jourdan et al., 2006) using the software ArAR v1.00 (Mercer and Hodges, 2016). The error on individual J-factors is estimated at  $\pm 0.6\%$  ( $2\sigma$ ). As the J-factor error is systematic and unrelated to individual analyses, correction for this uncertainty was not applied until calculation of ages from isotopic correlation diagrams (Roddick, 1988).

In step heat gas-release spectra presented here, a plateau is defined as  $\geq 3$  consecutive heating steps that comprise  $\geq 50\%$  of the total  $^{39}\text{Ar}$  gas released and for which the probability-of-fit of the weighted-mean age of the steps is greater than 5% (following the statistical plateau selection criteria of Isoplot v.4.15; Ludwig, 2003). Plateau ages were calculated as weighted-mean ages using the methodology of Isoplot v.4.15 (Ludwig, 2003). MSWD is defined as the mean square of weighted deviates. For some analyses in which no plateau was obtained, a “pseudoplateau” age was calculated from  $\geq 3$  consecutive heating steps that meet the following criteria: (i) they comprise at least 35% of total  $^{39}\text{Ar}$  released, with MSWD less than 1.50; or (ii) they are the final heating steps after a “descending staircase” pattern (discussed below) and comprise at least 15% of total  $^{39}\text{Ar}$  released, with MSWD less than 1.50; or (iii) they comprise at least 45% of total  $^{39}\text{Ar}$  released and yield an age that is supported by a second aliquot (i.e., biotite sample TA-63-156). For samples that yielded irregular gas release spectra that did not meet the criteria for pseudoplateau ages, no ages are reported. Integrated (total gas) ages were calculated by weighting all the individual step ages and respective errors by the fraction of  $^{39}\text{Ar}$  released.

Age interpretations are nuanced in several cases where  $^{40}\text{Ar}/^{39}\text{Ar}$  step-heating spectra show patterns diagnostic of partial Ar loss and/or excess Ar. Partial Ar loss refers to the removal of a component of daughter  $^{40}\text{Ar}^*$  from the mineral, and is represented in many of the Ar release spectra

as an “ascending” pattern in the initial, low-temperature steps (McDougall and Harrison, 1999). “Descending” patterns in the initial, low-temperature steps (or throughout the entire age spectrum), saddle-shaped spectra, and/or dates that are incompatible with other known age constraints (e.g., unrealistically old), are considered to be diagnostic of excess  $^{40}\text{Ar}$ , which refers to  $^{40}\text{Ar}$  derived from outside the analyzed mineral and incorporated during crystallization or diffusion (Kelley, 2002). Interaction of these two phenomena produced instances of hump-shaped apparent age spectra. In some samples, pseudoplateau ages were calculated from the last few steps after a descending gas-release pattern, on the basis that excess  $^{40}\text{Ar}$  was preferentially released in the early steps. Additionally, due to the higher solubility of Ar in biotite, excess Ar is preferentially taken in by biotite rather than muscovite or hornblende (e.g., Roddick et al., 1980; Kelley, 2002). Therefore, biotite dates that are older than those of muscovite or hornblende from the same sample are likely affected by excess Ar contamination. Even biotite with flat spectra can be contaminated by excess Ar (Pankhurst et al., 1973; Foland, 1983). Too-old apparent ages can also result from incomplete resetting during metamorphism (e.g., at temperatures  $<T_c$ ), whereby  $^{40}\text{Ar}$  is inherited from  $^{40}\text{K}$  decay prior to the metamorphic thermal peak (Kelley, 2002; Warren et al., 2012; Smye et al., 2013; Skipton et al., 2018).

## <sup>40</sup>Ar/<sup>39</sup>Ar sample descriptions and gas-release spectra

### *CSB: Povungnituk Group*

---

**Sample Number:** 85-SAB-B86

**Lithology:** Metabasite

**Mineral analyzed:** Hornblende

**Age:**  $1700 \pm 16$  Ma

**Interpretation:** Cooling age

**Location:**

**Lat:** 61.652558

**Long:** -72.588608

**Results:** Step heating of hornblende yielded a relatively homogeneous gas release spectrum with a plateau age of  $1700 \pm 16$  Ma, which is interpreted as the cooling age of hornblende.

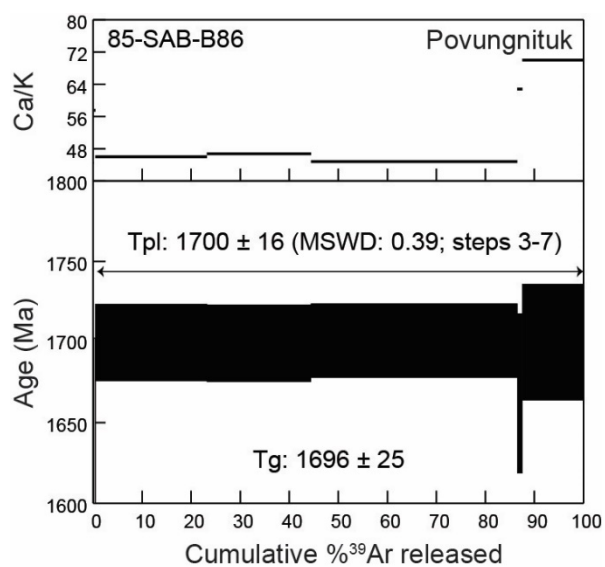

Figure S1: <sup>40</sup>Ar/<sup>39</sup>Ar step-heating hornblende spectrum. “Tpl” and “Tg” refer to plateau age and total gas (integrated) age, respectively, in all figures in this document.

**CSB: Povungnituk Group**

---

**Sample Number:** 85-SAB-B123

**Lithology:** Metabasite

**Mineral analyzed:** Biotite

**Age:**  $1723 \pm 10$  Ma

**Interpretation:** Cooling age

**Location:**

**Lat:** 61.502619

**Long:** -72.621864

**Results:** The biotite step heating spectrum exhibits Ar loss in the first ~15% of  $^{39}\text{Ar}$  released, followed by relatively homogeneous middle steps that yield a plateau age of  $1723 \pm 10$  Ma. This age is interpreted as the cooling age of biotite.

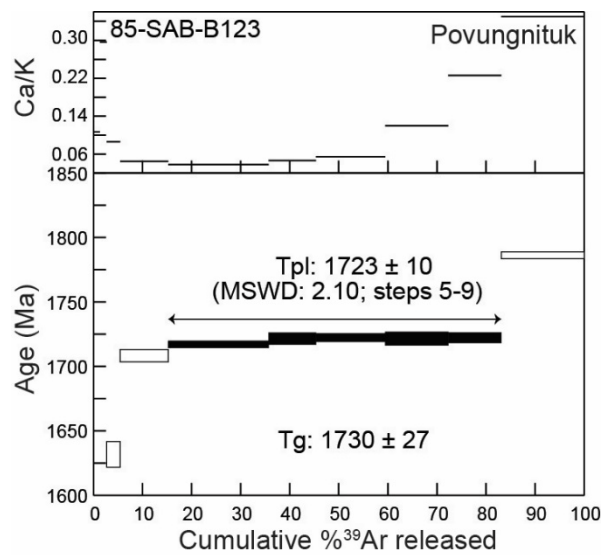

Figure S2:  $^{40}\text{Ar}/^{39}\text{Ar}$  step-heating biotite spectrum.

## CSB: Povungnituk Group

---

**Sample Number:** 85-SAB-B123

**Lithology:** Metabasite

**Mineral analyzed:** Hornblende

**Age:**  $1748 \pm 16$  Ma

**Interpretation:** Maximum cooling age

**Location:**

**Lat:** 61.502619

**Long:** -72.621864

**Results:** The gas release spectrum of hornblende exhibits an overall downward-stepping pattern, suggesting an excess Ar component. The final gas release step has an elevated Ca/K ratio, suggesting de-gassing of a chemically different phase. The middle steps yielded a plateau age of  $1748 \pm 16$  Ma. Given the probability of an excess Ar component, we interpret this as the maximum cooling age for hornblende.

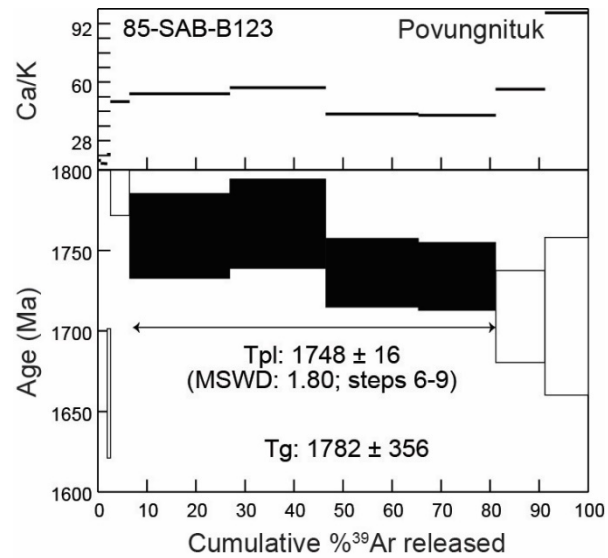

Figure S3:  $^{40}\text{Ar}/^{39}\text{Ar}$  step-heating hornblende spectrum.



## **CSB: Povungnituk Group**

---

**Sample Number:** 85-SAB-B149

**Lithology:** Metabasite

**Mineral analyzed:** Biotite

**Age:**  $1859 \pm 11$  Ma

**Interpretation:** Maximum cooling age

**Location:**

**Lat:** 61.377358

**Long:** -72.451833

**Results:** Step heating of biotite yielded a gas release spectrum with Ar loss in the initial steps, followed by a plateau age of  $1859 \pm 11$  Ma. The low MSWD and high % $^{39}\text{Ar}$  (71%) of the plateau age indicate that it can be interpreted with high confidence, although ca. 1859 Ma is an anomalously old biotite date for the CSB. Considering the metamorphic grade at the sample location ( $\geq 400^\circ\text{C}$ ), the old date is most likely due to excess  $^{40}\text{Ar}$  contamination rather than to incomplete resetting of  $^{40}\text{Ar}/^{39}\text{Ar}$  systematics. It is interpreted to represent a maximum cooling age of biotite.

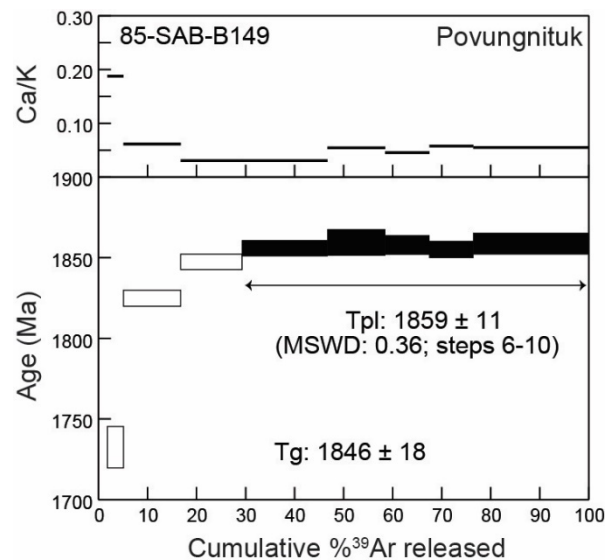

Figure S4:  $^{40}\text{Ar}/^{39}\text{Ar}$  step-heating biotite spectrum.

**CSB: Povungnituk Group**

---

**Sample Number:** 85-SAB-B149

**Lithology:** Metabasite

**Mineral analyzed:** Hornblende

**Age:** NO AGE.

**Interpretation:** N/A

**Location:**

**Lat:** 61.377358

**Long:** -72.451833

**Results:** Step heating of hornblende yielded a highly heterogeneous gas release spectrum with an overall downward age trend in gas release steps, possibly indicating an excess  $^{40}\text{Ar}$  component. Note also the heterogeneous Ca/K ratios. No age interpretation is made for this sample.

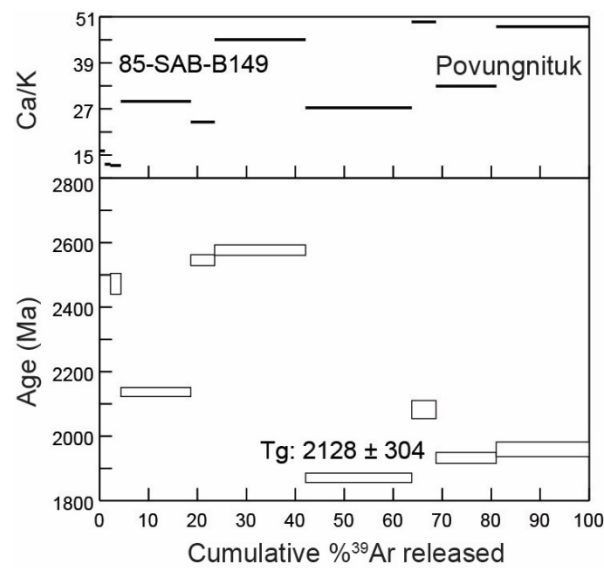

Figure S5:  $^{40}\text{Ar}/^{39}\text{Ar}$  step-heating hornblende spectrum.

### ***CSB: Povungnituk Group***

---

**Sample Number:** 85-SAB-L81

**Lithology:** Mafic meta-volcanic tuff

**Mineral analyzed:** Biotite

**Age:**  $1948 \pm 12$  Ma

**Interpretation:** N/A

**Location:**

**Lat:** 61.558689

**Long:** -72.497822

**Results:** Step heating of biotite yielded a plateau age of  $1948 \pm 12$  Ma, with a low MSWD and high total  $\%^{39}\text{Ar}$  (85%). However, the late, high-temperature steps included in the plateau have high uncertainties and correspond to elevated Ca/K ratios, suggesting de-gassing of a non-biotite component. Furthermore, the apparent age of ca. 1948 Ma is significantly older than that of muscovite in the same sample (ca. 1697 Ma, presented below) and than other biotite dates in the CSB. As such, it is considered to reflect significant excess  $^{40}\text{Ar}$  contamination, and has little geological significance.

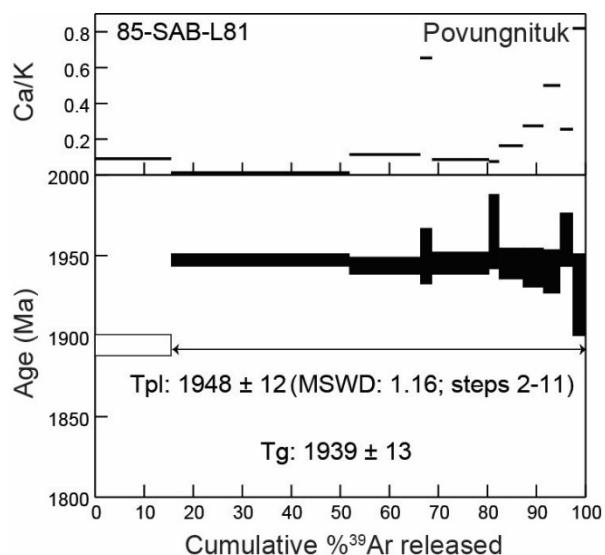

Figure S6:  $^{40}\text{Ar}/^{39}\text{Ar}$  step-heating biotite spectrum.

## CSB: Povungnituk Group

---

**Sample Number:** 85-SAB-L81

**Lithology:** Mafic meta-volcanic tuff

**Mineral analyzed:** Muscovite

**Age:**  $1697 \pm 10$  Ma

**Interpretation:** Cooling age

**Location:**

**Lat:** 61.558689

**Long:** -72.497822

**Results :** The gas release spectrum produced from step heating of muscovite exhibits Ar loss in the initial steps, followed by homogeneous steps that define a plateau age of  $1697 \pm 10$  Ma. Comprising 80% of total  $^{39}\text{Ar}$  released, this plateau age is interpreted as the cooling age of muscovite.

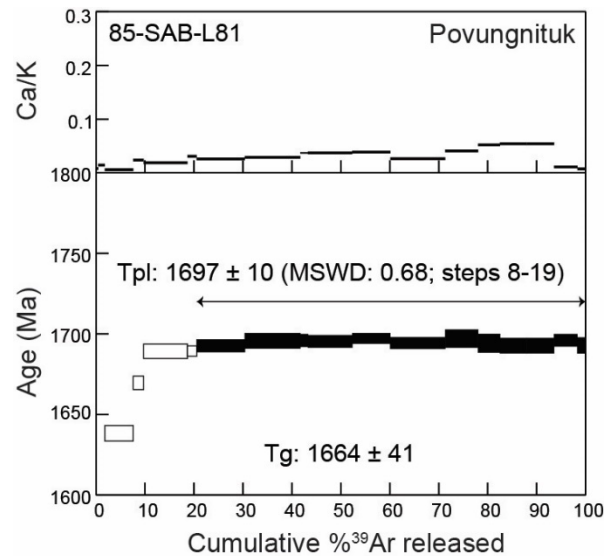

Figure S7:  $^{40}\text{Ar}/^{39}\text{Ar}$  step-heating muscovite spectrum.

## ***CSB: Povungnituk Group***

---

**Sample Number:** 85-SAB-S41

**Lithology:** Mafic metasedimentary rock

**Mineral analyzed:** Biotite

**Age:**  $1734 \pm 11$  Ma

**Interpretation:** Cooling age

**Location:**

**Lat:** 61.597789

**Long:** -72.173803

**Results:** The gas release spectrum from step heating of biotite yielded steps with progressively older ages from ca. 1670 and 1730 Ma, preceded by steps with younger apparent ages that indicate Ar loss. Although no plateau age was attained, the flattest portion of the spectrum defined by the last three steps yielded a pseudoplateau age of  $1734 \pm 11$  Ma, comprising 39% of total  $^{39}\text{Ar}$  gas released. This is interpreted as the approximate cooling age of biotite.

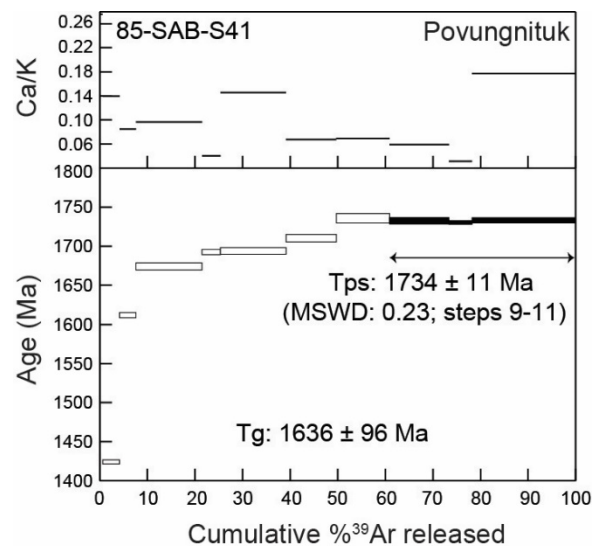

Figure S8:  $^{40}\text{Ar}/^{39}\text{Ar}$  step-heating biotite spectrum. “Tps” refers to pseudoplateau age in all figures in this report.

**Sample Number:** 85-SAB-S41

**Lithology:** Mafic metasedimentary rock

**Mineral analyzed:** Hornblende

**Age:** NO AGE

**Interpretation:** N/A

**Location:**

**Lat:** 61.597789

**Long:** -72.173803

**Results:** The gas release steps from step heating of hornblende have highly heterogeneous apparent ages, all younger than ca. 1300 Ma, and variable Ca/K ratios. Therefore, no geological interpretation is made for this sample.

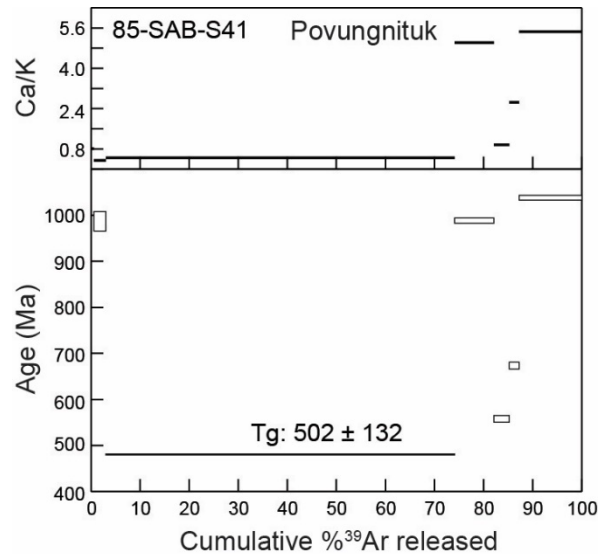

Figure S9: <sup>40</sup>Ar/<sup>39</sup>Ar step-heating hornblende spectrum.

**CSB: Povungnituk Group**

---

**Sample Number:** 85-SAB-S50b

**Lithology:** Mafic metasedimentary rock

**Mineral analyzed:** Biotite

**Age:**  $1724 \pm 10$  Ma

**Interpretation:** Cooling age

**Location:**

**Lat:** 61.571478

**Long:** -72.2784

**Results:** The gas release spectrum produced from step heating of biotite has an upward-stepping staircase pattern exhibited by early heating steps, suggesting Ar loss. Subsequent steps are relatively homogeneous, producing a plateau age of  $1724 \pm 10$  Ma, which is interpreted as the cooling age of biotite.

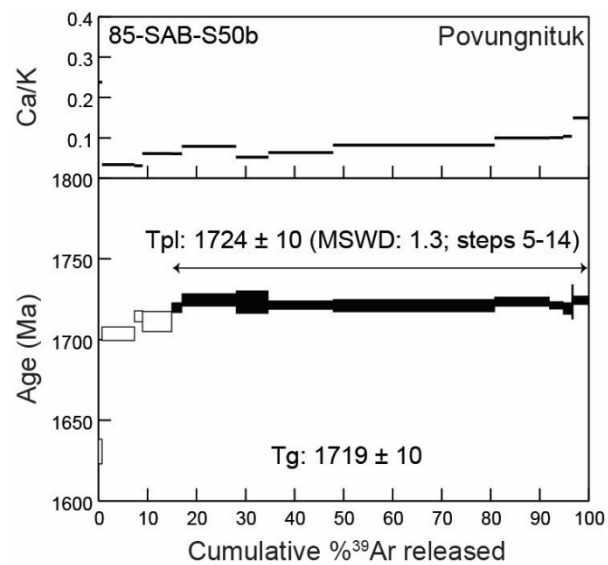

Figure S10:  $^{40}\text{Ar}/^{39}\text{Ar}$  step-heating biotite spectrum.

**CSB: Povungnituk Group**

---

**Sample Number:** 85-SAB-S50b

**Lithology:** Mafic metasedimentary rock

**Mineral analyzed:** Hornblende

**Age:**  $1722 \pm 11$  Ma

**Interpretation:** Cooling age

**Location:**

**Lat:** 61.571478

**Long:** -72.2784

**Results:** Step heating of hornblende yielded a gas release spectrum with a “climbing staircase” pattern exhibited by early gas release steps, suggesting Ar loss. Subsequent steps produced a plateau age of  $1722 \pm 11$  Ma, which is interpreted as the cooling age of hornblende.

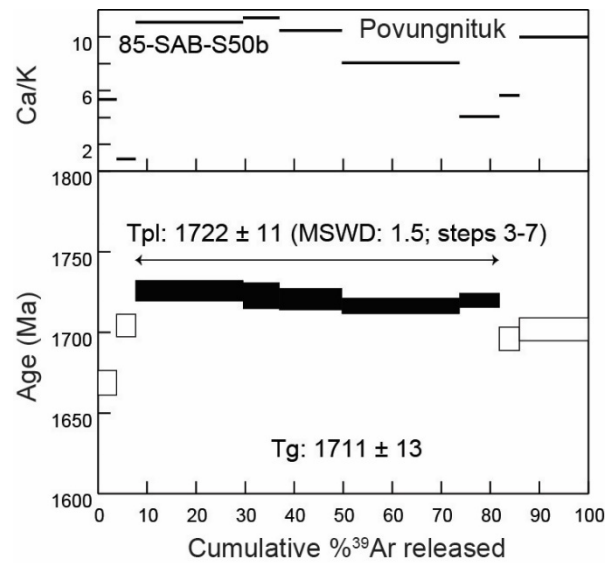

Figure S11:  $^{40}\text{Ar}/^{39}\text{Ar}$  step-heating hornblende spectrum.



**Sample Number:** 85-SAB-S52

**Lithology:** Pelite

**Mineral analyzed:** Biotite

**Age:**  $1733 \pm 10$  Ma

**Interpretation:** Cooling age

**Location:**

**Lat:** 61.575661

**Long** -72.278481

**Results:** Step heating of biotite produced a gas release spectrum with a “climbing staircase” pattern in the early steps, followed by relatively homogeneous steps that yielded a plateau age of  $1733 \pm 10$  Ma. This age is interpreted as the cooling age of biotite.

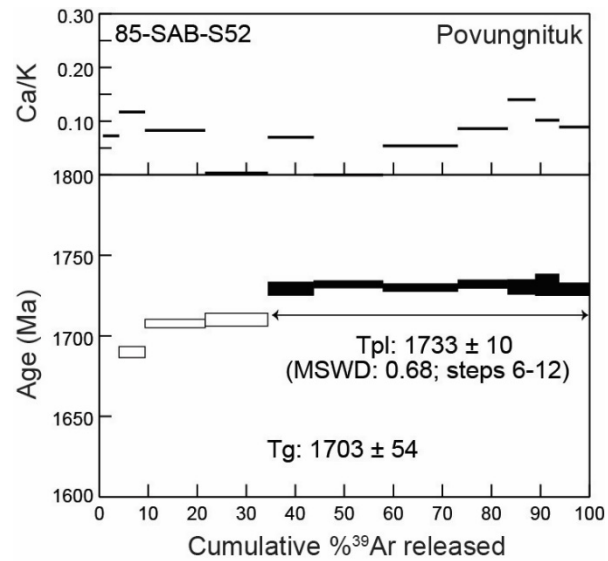

Figure S12:  $^{40}\text{Ar}/^{39}\text{Ar}$  step-heating biotite spectrum.

**Sample Number:** 85-SAB-S52

**Lithology:** Pelite

**Mineral analyzed:** Muscovite

**Age:**  $1717 \pm 10$  Ma

**Interpretation:** Cooling age

**Location:**

**Lat:** 61.575661

**Long** -72.278481

**Results:** Step heating of muscovite yielded relatively homogeneous gas release spectrum with a plateau age of  $1717 \pm 10$  Ma, which is interpreted as the cooling age of muscovite.

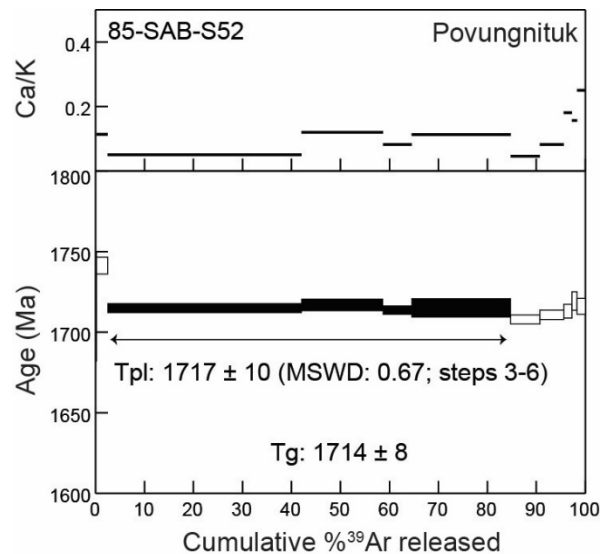

Figure S13:  $^{40}\text{Ar}/^{39}\text{Ar}$  step-heating muscovite spectrum.

**Sample Number:** 85-SAB-S64

**Lithology:** Metabasite

**Mineral analyzed:** Hornblende

**Age:**  $1731 \pm 21$  Ma

**Interpretation:** Maximum cooling age

**Location:**

**Lat:** 61.579367

**Long** -72.472039

**Results:** Step heating of hornblende yielded a saddle-shaped gas release spectrum, suggesting contamination with excess Ar. The middle steps yielded a plateau age of  $1731 \pm 21$  Ma, which is interpreted as the maximum cooling age of hornblende.

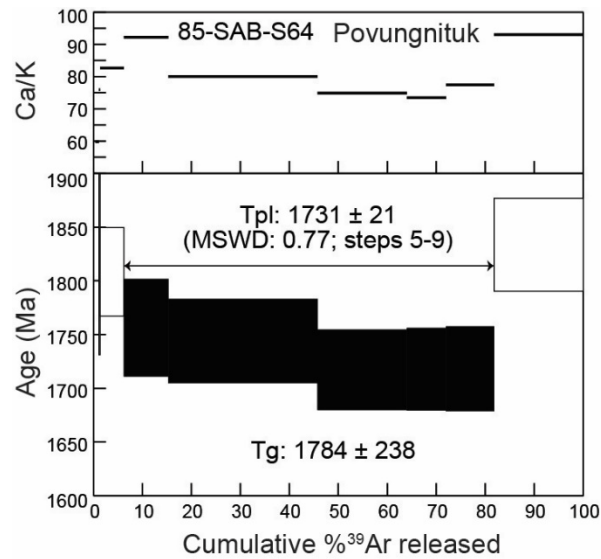

Figure S14:  $^{40}\text{Ar}/^{39}\text{Ar}$  step-heating hornblende spectrum.

**Sample Number:** 87-SAB-L325

**Lithology:** Semi-pelite

**Mineral analyzed:** Biotite

**Age:**  $1760 \pm 11$  Ma

**Interpretation:** Maximum cooling age

**Location:**

**Lat:** 61.340936

**Long** -74.48705

**Results:** Step heating of biotite produced a gas release spectrum with an upward-stepping pattern for the initial ~45% of  $^{39}\text{Ar}$  released, suggesting Ar loss. Subsequent steps yielded a plateau age of  $1760 \pm 11$  Ma. This is significantly older than most mica and hornblende dates from the belt, and overlaps with ages yielded from samples that exhibit evidence of excess Ar. Therefore, as it probably also contains excess Ar, we interpret  $1760 \pm 11$  Ma as the maximum cooling age of biotite.

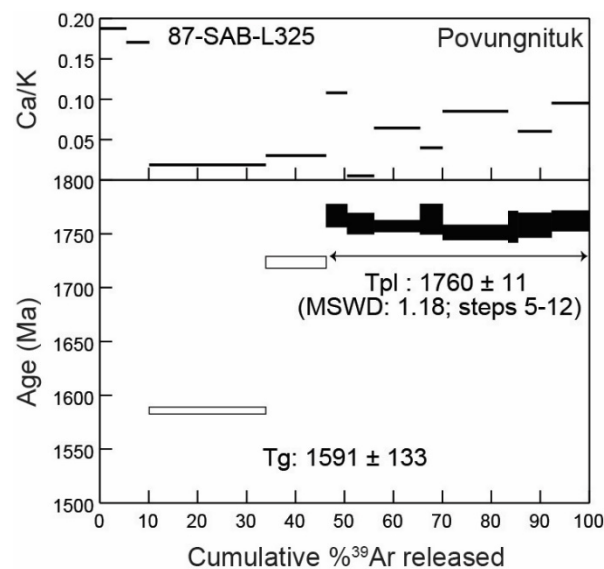

Figure S15:  $^{40}\text{Ar}/^{39}\text{Ar}$  step-heating biotite spectrum.

**CSB: Povungnituk Group**

---

**Sample Number:** 87-SAB-S245

**Lithology:** Mafic metasedimentary rock

**Mineral analyzed:** Hornblende

**Age:**  $1694 \pm 15$  Ma

**Interpretation:** Cooling age

**Location:**

**Lat:** 61.458375

**Long:** -74.494944

**Results:** Step heating of hornblende yielded a homogeneous gas release spectrum with a plateau age of  $1694 \pm 15$  Ma, which is interpreted as the cooling age of hornblende.

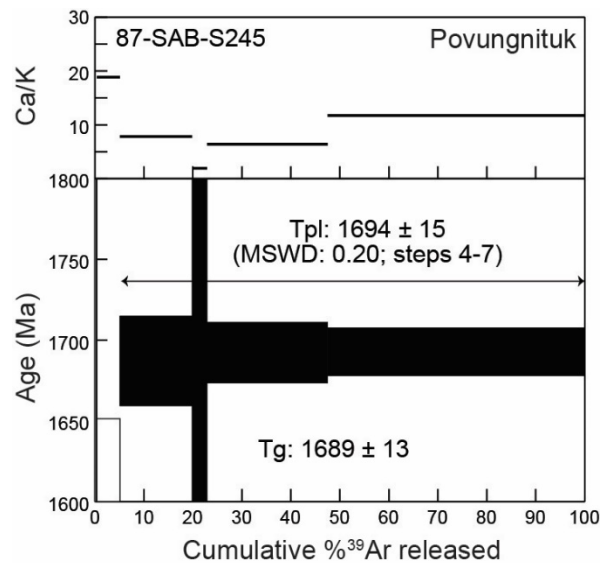

Figure S16:  $^{40}\text{Ar}/^{39}\text{Ar}$  step-heating hornblende spectrum.

**Sample Number:** 86-SAB-L193

**Lithology:** Quartzite

**Mineral analyzed:** Biotite

**Age:** NO AGE

**Interpretation:** N/A

**Location:**

**Lat:** 61.928197

**Long:** -74.332992

**Results:** Step heating of biotite yielded a highly heterogeneous gas release spectrum, precluding a geological age interpretation for this sample.

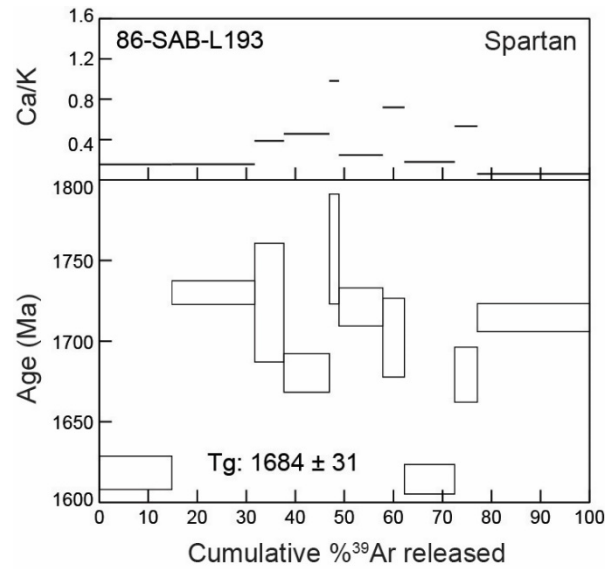

Figure S17: <sup>40</sup>Ar/<sup>39</sup>Ar step-heating biotite spectrum.

**CSB: Spartan Group**

---

**Sample Number:** 86-SAB-L193

**Lithology:** Quartzite

**Mineral analyzed:** Muscovite

**Age:**  $1727 \pm 11$  Ma

**Interpretation:** Cooling age

**Location:**

**Lat:** 61.928197

**Long:** -74.332992

**Results:** Step heating of muscovite yielded a homogeneous gas release spectrum with a plateau age of  $1727 \pm 11$  Ma, which is interpreted as the cooling age of muscovite.

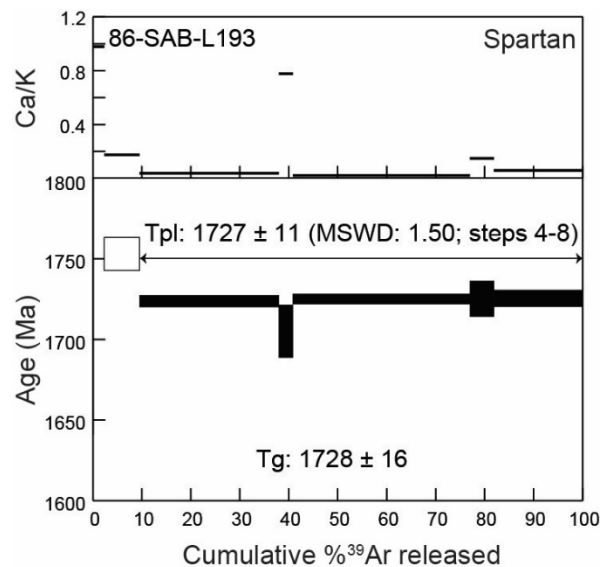

Figure S18:  $^{40}\text{Ar}/^{39}\text{Ar}$  step-heating muscovite spectrum.

**Sample Number:** 86-SAB-L194

**Lithology:** Quartzite

**Mineral analyzed:** Biotite

**Age:**  $1723 \pm 10$  Ma

**Interpretation:** Cooling age

**Location:**

**Lat:** 61.929842

**Long:** -74.332128

**Results:** Step heating of biotite yielded a “climbing staircase” pattern in the early (first ~10%  $^{39}\text{Ar}$ ) gas release steps, suggesting minor Ar loss. Subsequent steps produced a plateau age of  $1723 \pm 10$  Ma, which is interpreted as the cooling age of biotite.

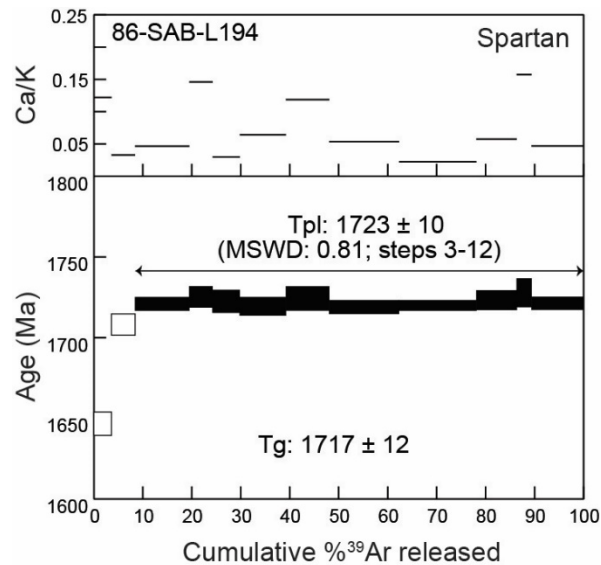

Figure S19:  $^{40}\text{Ar}/^{39}\text{Ar}$  step-heating biotite spectrum.



**CSB: Spartan Group**

---

**Sample Number:** 86-SAB-L194

**Lithology:** Quartzite

**Mineral analyzed:** Muscovite

**Age:**  $1731 \pm 10$  Ma

**Interpretation:** Cooling age

**Location:**

**Lat:** 61.929842

**Long:** -74.332128

**Results:** Step heating of muscovite yielded a plateau age of  $1731 \pm 10$  Ma, which is interpreted as the cooling age of muscovite.

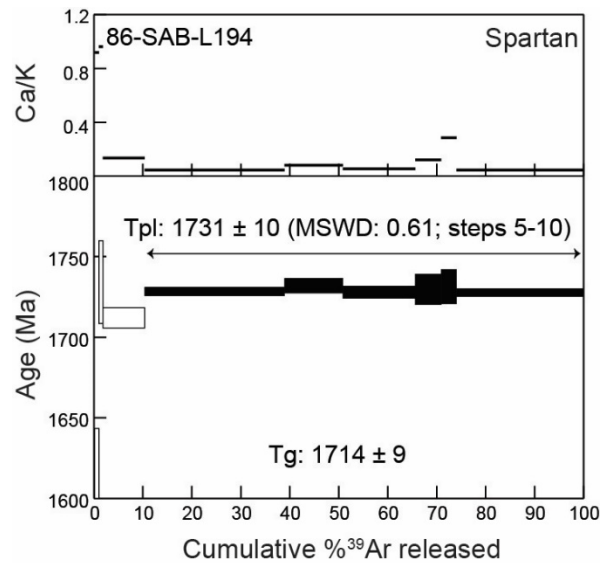

Figure S20:  $^{40}\text{Ar}/^{39}\text{Ar}$  step-heating muscovite spectrum.

**CSB: Spartan Group**

---

**Sample Number:** 86-SAB-L244

**Lithology:** Metabasite

**Mineral analyzed:** Hornblende

**Age:**  $1704 \pm 14$  Ma

**Interpretation:** Cooling age

**Location:**

**Lat:** 61.71955

**Long:** -74.489008

**Results:** Step heating of hornblende yielded a plateau age of  $1704 \pm 14$  Ma, which is interpreted as the cooling age of hornblende.

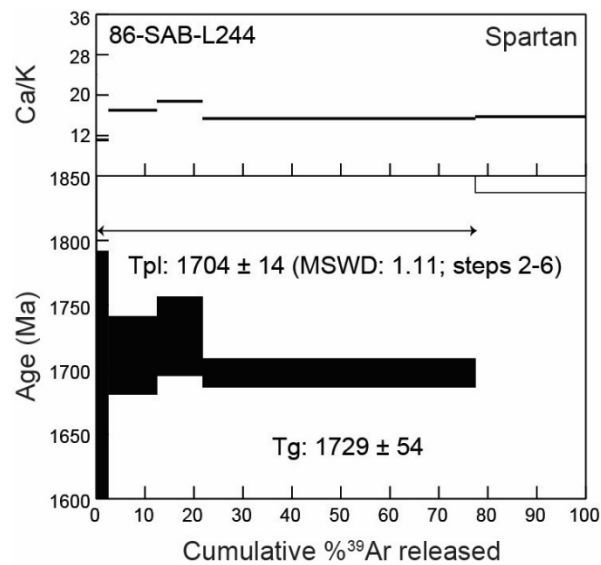

Figure S21:  $^{40}\text{Ar}/^{39}\text{Ar}$  step-heating hornblende spectrum.

**CSB: Spartan Group**

---

**Sample Number:** 87-SAB-L356

**Lithology:** Semi-pelite

**Mineral analyzed:** Biotite

**Age:**  $1722 \pm 10$  Ma

**Interpretation:** Cooling age

**Location:**

**Lat:** 61.830725

**Long:** -73.308378

**Results:** Step heating of biotite yielded a relatively homogeneous gas release spectrum with a plateau age of  $1722 \pm 10$  Ma, which is interpreted as the cooling age of biotite.

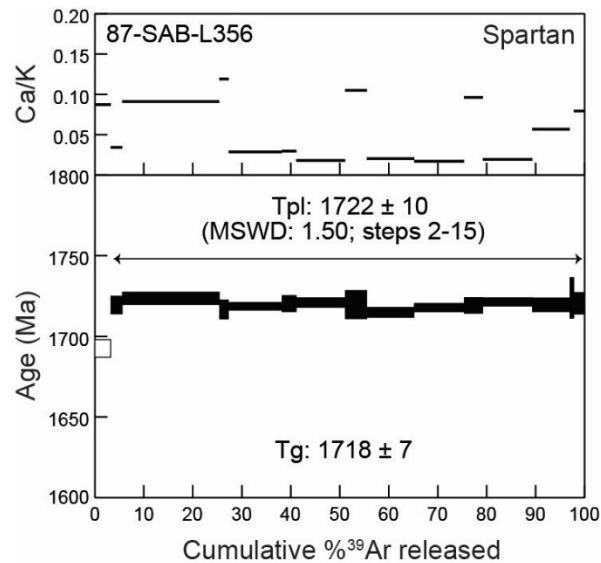

Figure S22:  $^{40}\text{Ar}/^{39}\text{Ar}$  step-heating biotite spectrum.

**Sample Number:** 87-SAB-L356

**Lithology:** Semi-pelite

**Mineral analyzed:** Muscovite

**Age:**  $1707 \pm 10$  Ma

**Interpretation:** Cooling age

**Location:**

**Lat:** 61.830725

**Long:** -73.308378

**Results:** Step heating of muscovite yielded a relatively homogeneous gas release spectrum with a plateau age of  $1707 \pm 10$  Ma, which is interpreted as the cooling age of muscovite.

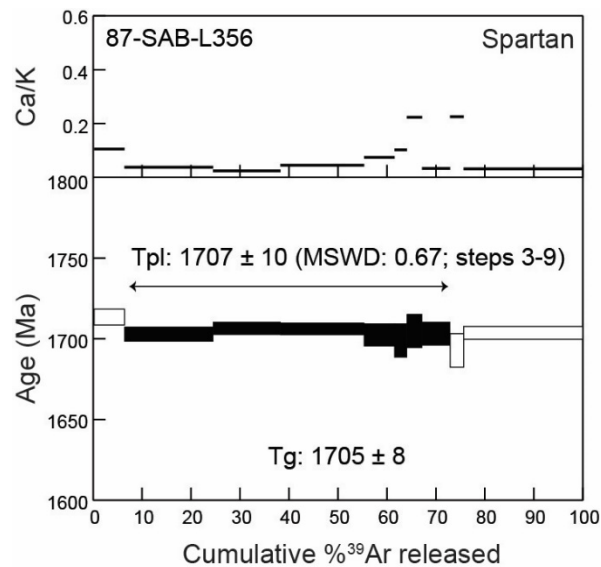

Figure S23:  $^{40}\text{Ar}/^{39}\text{Ar}$  step-heating muscovite spectrum.

**Sample Number:** 87-SAB-S284

**Lithology:** Metabasite

**Mineral analyzed:** Hornblende

**Age:**  $1728 \pm 11$  Ma

**Interpretation:** Cooling age

**Location:**

**Lat:** 61.816

**Long:** -73.271861

**Results:** Step heating of hornblende yielded a homogeneous gas release spectrum with a plateau age of  $1728 \pm 11$  Ma, which is interpreted as the cooling age of hornblende.

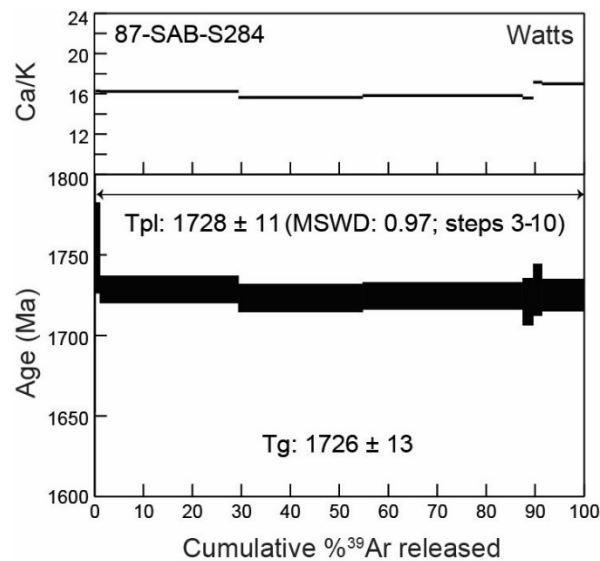

Figure S24:  $^{40}\text{Ar}/^{39}\text{Ar}$  step-heating hornblende spectrum.

***Superior craton (CSB shear zones)***

---

**Sample Number:** 85-SAB-S38

**Lithology:** Quartzo-feldspathic gneiss

**Mineral analyzed:** Biotite

**Age:**  $1708 \pm 10$  Ma

**Interpretation:** Cooling age

**Location:**

**Lat:** 61.601311

**Long:** -72.169872

**Results:** Step heating of biotite yielded an upward-stepping pattern in the gas release spectrum, suggesting Ar loss. The last ~60% of the  $^{39}\text{Ar}$  released yielded a plateau age of  $1708 \pm 10$  Ma, which is interpreted as the cooling age of biotite.

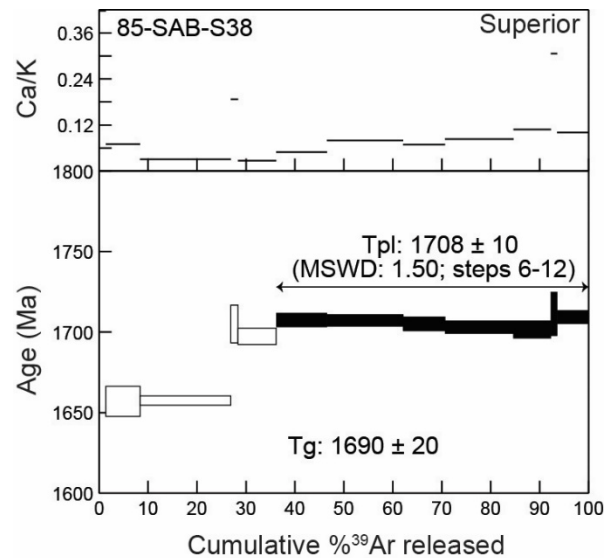

Figure S25:  $^{40}\text{Ar}/^{39}\text{Ar}$  step-heating biotite spectrum.

***Superior craton (CSB shear zones)***

---

**Sample Number:** 85-SAB-L76b

**Lithology:** Quartzo-feldspathic gneiss

**Mineral analyzed:** Biotite

**Age:**  $1735 \pm 10$  Ma

**Interpretation:** Maximum cooling age

**Location:**

**Lat:** 61.554786

**Long:** -72.515592

**Results:** Step heating of biotite yielded a plateau age of  $1735 \pm 10$  Ma. A “climbing staircase” pattern exhibited by the early (initial  $\sim 15\%$   $^{39}\text{Ar}$ ) gas release steps suggests Ar loss, although excess Ar contamination of biotite is implied by the younger apparent age of muscovite from the same sample (ca. 1707 Ma, presented below). Therefore,  $1735 \pm 10$  Ma is interpreted as the maximum cooling age of biotite.

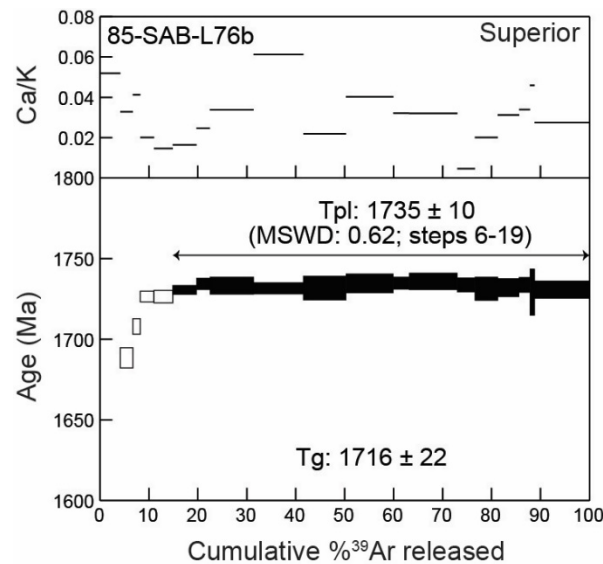

Figure S26:  $^{40}\text{Ar}/^{39}\text{Ar}$  step-heating biotite spectrum.

***Superior craton (CSB shear zones)***

---

**Sample Number:** 85-SAB-L76b

**Lithology:** Quartzo-feldspathic gneiss

**Mineral analyzed:** Muscovite

**Age:**  $1707 \pm 11$  Ma

**Interpretation:** Cooling age

**Location:**

**Lat:** 61.554786

**Long:** -72.515592

**Results:** Step heating of muscovite yielded a homogeneous gas release spectrum with a plateau age of  $1707 \pm 11$  Ma, which is interpreted as the cooling age of muscovite.

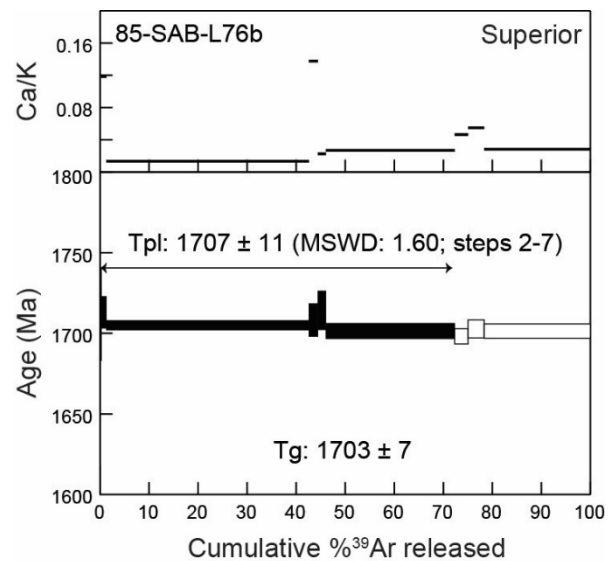

Figure S27:  $^{40}\text{Ar}/^{39}\text{Ar}$  step-heating muscovite spectrum.



*Superior craton (CSB shear zones)*

---

**Sample Number:** 86-SAB-L192

**Lithology:** Tonalite

**Mineral analyzed:** Muscovite

**Age:**  $1726 \pm 11$  Ma

**Interpretation:** Cooling age

**Location:**

**Lat:** 61.927122

**Long:** -74.325381

**Results:** Step heating of muscovite yielded a homogeneous gas release spectrum with a plateau age of  $1726 \pm 11$  Ma, which is interpreted as the cooling age of muscovite.

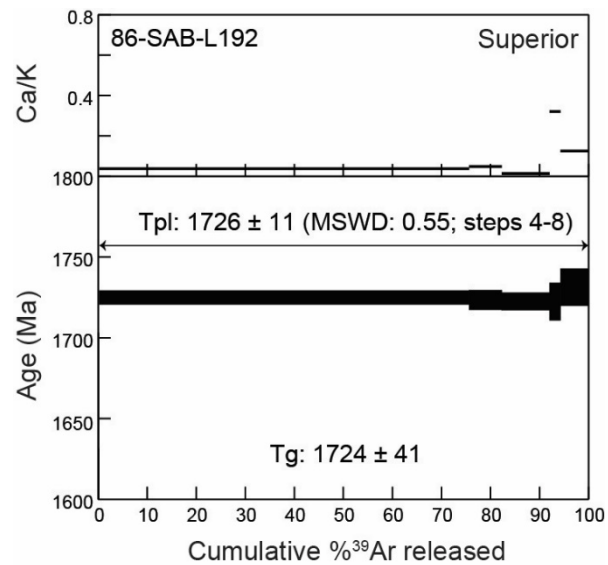

Figure S28:  $^{40}\text{Ar}/^{39}\text{Ar}$  step-heating muscovite spectrum.

### *Superior craton (CSB shear zones)*

---

**Sample Number:** 86-SAB-L196

**Lithology:** Tonalite

**Mineral analyzed:** Biotite

**Age:**  $1768 \pm 11$  Ma

**Interpretation:** Maximum cooling age

**Location:**

**Lat:** 61.926606

**Long:** -74.360133

**Results:** Step heating of biotite produced an upward-stepping pattern in the early gas release steps, suggesting Ar loss, followed by a flat spectrum. The latter steps yielded a plateau age of  $1768 \pm 11$  Ma, which is significantly older than most mica and hornblende dates from the belt, and overlaps with ages yielded from samples that exhibit evidence of excess Ar. Therefore, as it may also contain excess Ar, we interpret  $1768 \pm 10$  Ma as the maximum cooling age of biotite.

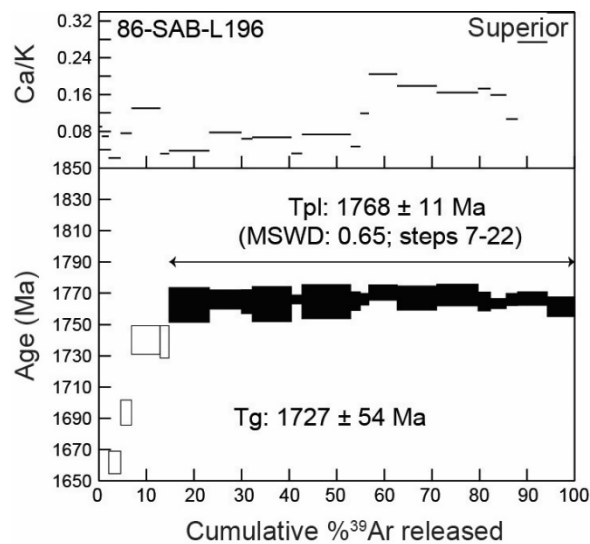

Figure S29:  $^{40}\text{Ar}/^{39}\text{Ar}$  step-heating biotite spectrum.

### *Superior craton (CSB shear zones)*

---

**Sample Number:** 86-SAB-L211

**Lithology:** Tonalite

**Mineral analyzed:** Muscovite

**Age:**  $1801 \pm 12$  Ma

**Interpretation:** Maximum cooling age

**Location:**

**Lat:** 61.847689

**Long:** -73.957658

**Results:** The gas release spectrum yielded by step heating of muscovite is comprised of unequal steps with variable apparent ages, and no plateau age was attained. The down-stepping pattern suggests excess Ar contamination. The final three steps yielded a pseudoplateau age of  $1801 \pm 12$  Ma (MSWD = 0.70), which includes 16% of the total  $^{39}\text{Ar}$  released. This age is considered to be the maximum cooling age of biotite.

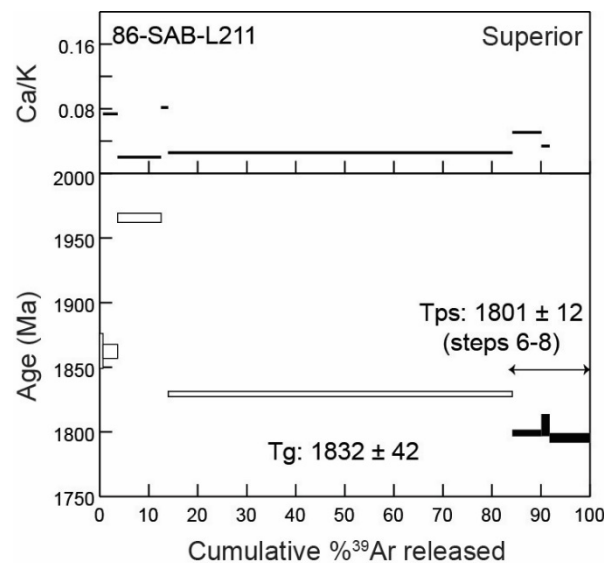

Figure S30:  $^{40}\text{Ar}/^{39}\text{Ar}$  step-heating muscovite spectrum.

***Superior craton (CSB shear zones)***

---

**Sample Number:** 87-SAB-L355

**Lithology:** Tonalite

**Mineral analyzed:** Biotite

**Age:**  $1816 \pm 11$  Ma

**Interpretation:** Maximum cooling age

**Location:**

**Lat:** 61.832961

**Long:** -73.310006

**Results:** Step heating of biotite yielded a plateau age of  $1816 \pm 11$  Ma. As this apparent age is significantly older than that of hornblende in the same sample (ca. 1764, presented below), it is likely contaminated with excess Ar, and is inferred to represent the maximum cooling age of biotite.

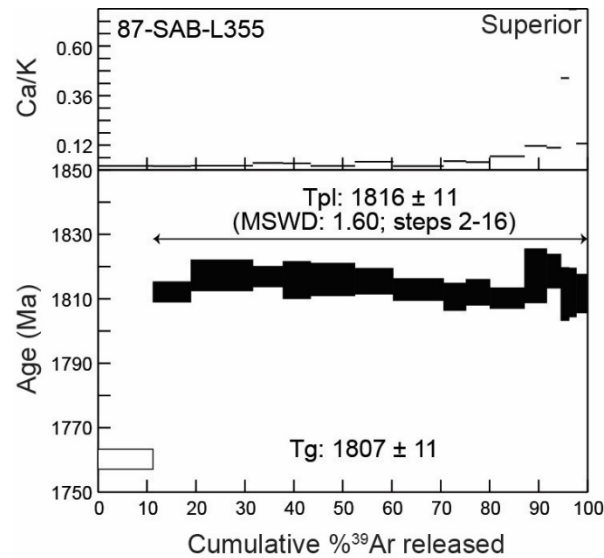

Figure S31:  $^{40}\text{Ar}/^{39}\text{Ar}$  step-heating biotite spectrum.

### *Superior craton (CSB shear zones)*

---

**Sample Number:** 87-SAB-L355

**Lithology:** Tonalite

**Mineral analyzed:** Hornblende

**Age:**  $1764 \pm 11$  Ma

**Interpretation:** Maximum cooling age

**Location:**

**Lat:** 61.832961

**Long:** -73.310006

**Results:** Step heating of hornblende yielded a homogeneous gas release spectrum with a plateau age of  $1764 \pm 11$  Ma. Excess Ar contamination is probable, as this age is older than other hornblende cooling ages in the CSB, and biotite from the same sample yielded a significantly older date. Therefore,  $1764 \pm 11$  Ma is interpreted as a maximum cooling age.

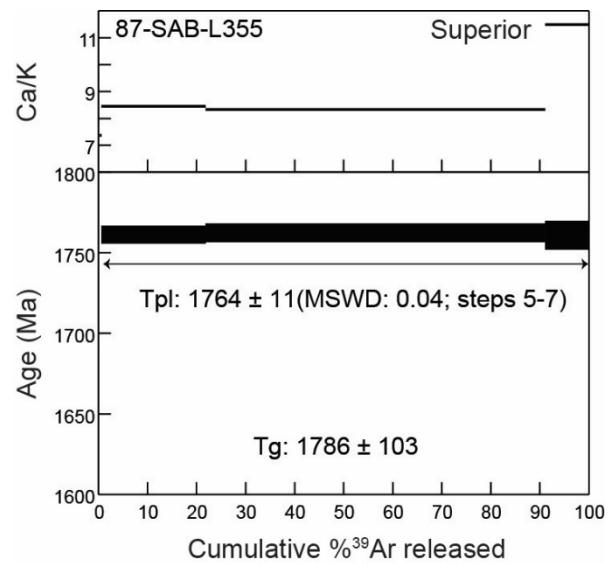

Figure S32:  $^{40}\text{Ar}/^{39}\text{Ar}$  step-heating hornblende spectrum.

***Superior craton (south of CSB)***

---

**Sample Number:** 87-SAB-S278

**Lithology:** Granite

**Mineral analyzed:** Biotite

**Age:**  $1867 \pm 11$  Ma

**Interpretation:** Partial resetting

**Location:**

**Lat:** 61.27645

**Long:** -74.479861

**Results:** Step heating of biotite yielded a plateau age of  $1867 \pm 11$  Ma, which is older than the age of CSB metamorphism, but significantly younger than Neoproterozoic metamorphism that affected the Superior craton. The age may reflect incomplete resetting of  $^{40}\text{Ar}/^{39}\text{Ar}$  systematics during CSB metamorphism (refer to manuscript for detailed discussion).

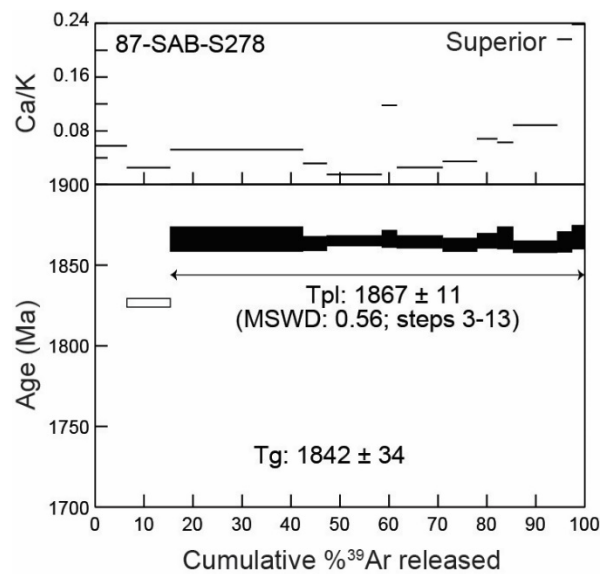

Figure S33:  $^{40}\text{Ar}/^{39}\text{Ar}$  step-heating biotite spectrum.

### *Superior craton (south of CSB)*

---

**Sample Number:** BK-63-139

**Lithology:** Granodiorite

**Mineral analyzed:** Biotite

**Age:**  $2324 \pm 8$  Ma

**Interpretation:** Partial resetting

**Location:**

**Lat:** 60.9001

**Long:** -75.08913

**Results:** Step heating of biotite yielded a complex gas release spectrum with a “descending staircase” pattern, indicative of excess Ar. The final three steps, which define the flattest part of the spectrum, yielded a pseudoplateau age of  $2324 \pm 8$  Ma, which comprises 16% of the total  $^{39}\text{Ar}$  released. We have low confidence on this age due to the low proportion of  $^{39}\text{Ar}$  and high Ca/K of the steps included in the pseudoplateau. It likely reflects the combined effects of excess Ar and incomplete resetting of Archean biotite during CSB metamorphism.

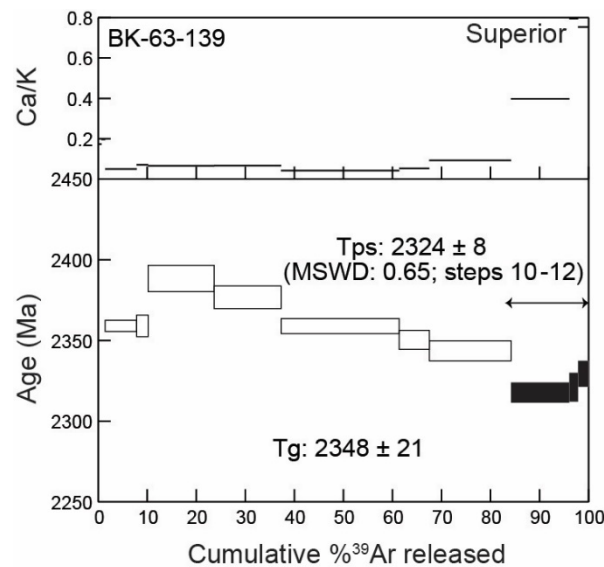

Figure S34:  $^{40}\text{Ar}/^{39}\text{Ar}$  step-heating biotite spectrum.

*Superior craton (south of CSB)*

---

**Sample Number:** GV-243-73

**Lithology:** Granite gneiss

**Mineral analyzed:** Biotite

**Age:** NO AGE

**Interpretation:** N/A

**Location:**

**Lat:** 61.00073

**Long:** -75.29582

**Results:** Step heating of biotite produced a complex, hump-shaped gas release spectrum that precludes an age interpretation for this sample.

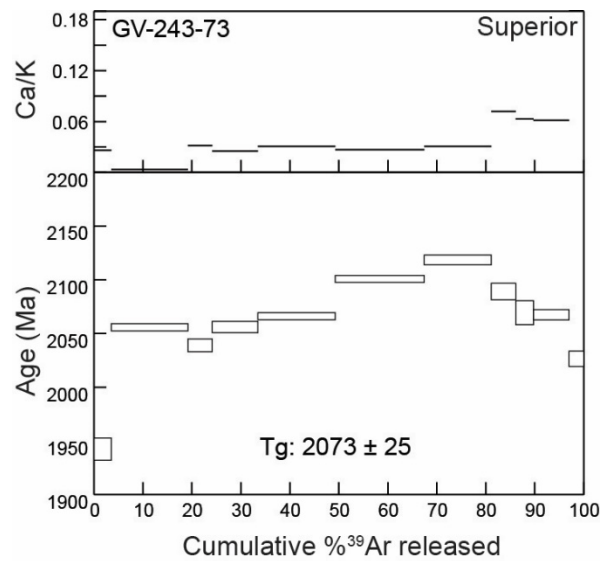

Figure S35:  $^{40}\text{Ar}/^{39}\text{Ar}$  step-heating biotite spectrum.



### *Superior craton (south of CSB)*

---

**Sample Number:** GV-245-73

**Lithology:** Granodiorite

**Mineral analyzed:** Biotite

**Age:**  $2000 \pm 12$  Ma

**Interpretation:** Partial resetting

**Location:**

**Lat:** 61.07004

**Long:** -75.1927

**Results:** Step heating of biotite produced a saddle-shaped gas release spectrum, suggesting contamination with excess  $^{39}\text{Ar}$ . The flattest part of the spectrum (the middle steps) yielded a pseudoplateau age of  $2000 \pm 12$  Ma, comprising 48% of total  $^{39}\text{Ar}$  released, with a low MSWD. This is older than CSB metamorphism, but significantly younger than Neoarchean metamorphism that affected the Superior craton. Thus, it is interpreted to reflect the incomplete Ar resetting of Archean biotite during CSB metamorphism, with possible excess Ar contamination (refer to manuscript for detailed discussion).

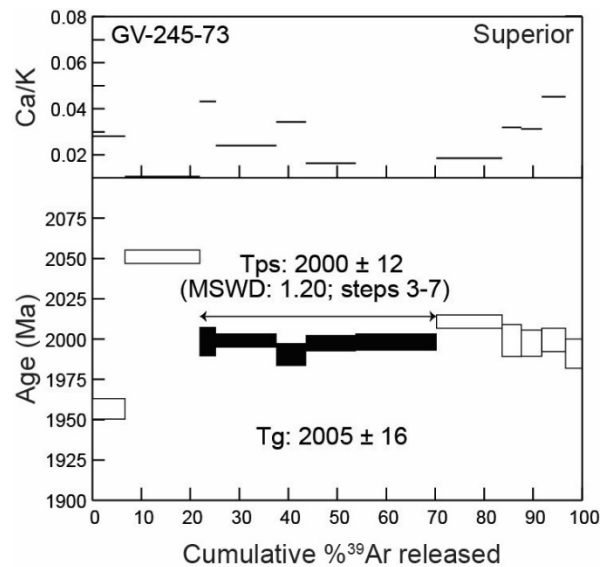

Figure S36:  $^{40}\text{Ar}/^{39}\text{Ar}$  step-heating biotite spectrum.

***Superior craton (south of CSB)***

---

**Sample Number:** GV-247-73

**Lithology:** Granite gneiss

**Mineral analyzed:** Biotite

**Age:**  $2169 \pm 13$  Ma

**Interpretation:** Partial resetting

**Location:**

**Lat:** 61.16613

**Long:** -75.17285

**Results:** Step heating of biotite yielded a plateau age of  $2169 \pm 13$  Ma. As this age is significantly younger than the Neoarchean metamorphism that affected the Superior craton, but significantly older than CSB cooling ages, it is interpreted to reflect partial Ar resetting (refer to manuscript for detailed discussion).

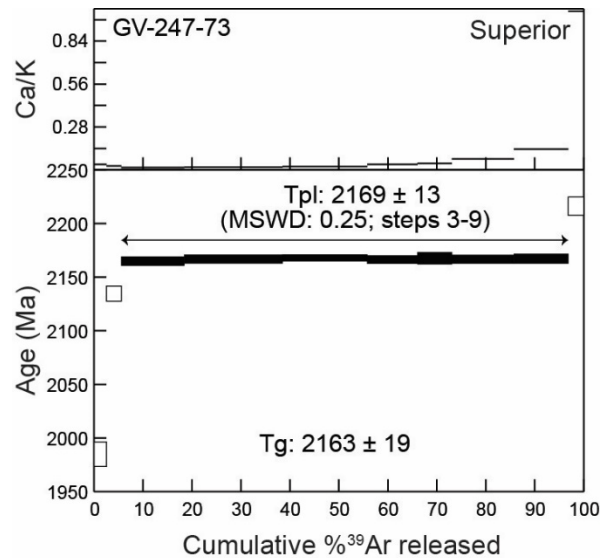

Figure S37:  $^{40}\text{Ar}/^{39}\text{Ar}$  step-heating biotite spectrum.

***Superior craton (south of CSB)***

---

**Sample Number:** GV-247-73

**Lithology:** Granite gneiss

**Mineral analyzed:** Hornblende

**Age:**  $2667 \pm 17$  Ma

**Interpretation:** Cooling age

**Location:**

**Lat:** 61.16613

**Long:** -75.17285

**Results:** Step heating of hornblende yielded a plateau age of  $2667 \pm 17$  Ma, which is interpreted as the cooling age of hornblende. The saddle-shaped spectrum suggests an excess Ar component.

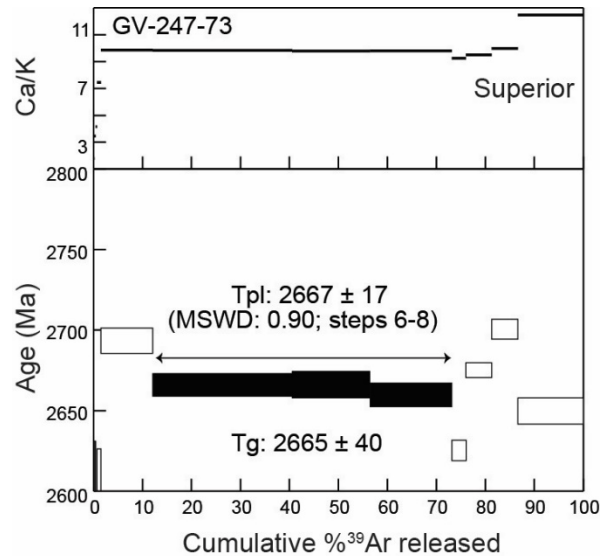

Figure S38:  $^{40}\text{Ar}/^{39}\text{Ar}$  step-heating hornblende spectrum.

### *Superior craton (south of CSB)*

---

**Sample Number:** GV-248-73

**Lithology:** Granodiorite

**Mineral analyzed:** Biotite

**Age:**  $2415 \pm 15$  Ma

**Interpretation:** Cooling age/partial resetting

**Location:**

**Lat:** 61.23346

**Long:** -75.16949

**Results:** Step heating spectra for two aliquots of biotite produced plateau ages of  $2400 \pm 15$  Ma and  $2415 \pm 15$  Ma. Our preferred age for this sample is  $2415 \pm 15$  Ma, as it has a lower MSWD and the gas steps included in this plateau age comprise a higher proportion of  $^{39}\text{Ar}$  (82%) than those of the other aliquot (75%). The  $2415 \pm 15$  Ma age is consistent with biotite cooling ages following Neoproterozoic metamorphism, undisturbed by CSB tectonism (see manuscript for details). However, it is significantly older than nearby biotite dates in the Superior craton, which we interpret to have been partially reset during CSB tectonism. It may reflect a minor degree of partial Ar resetting that occurred during CSB metamorphism (refer to manuscript for detailed discussion).

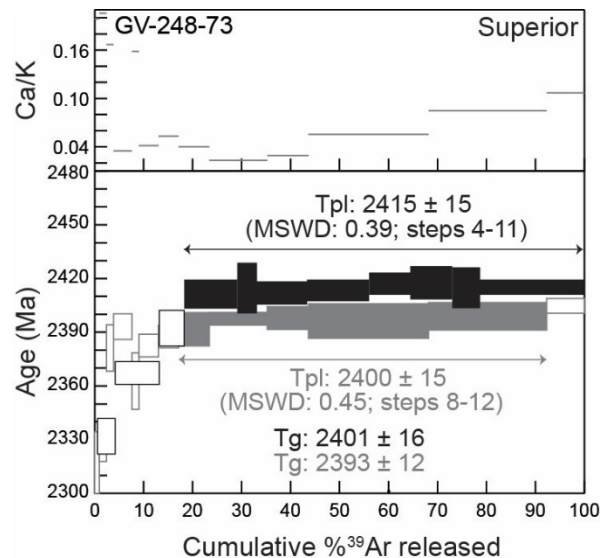

Figure S39:  $^{40}\text{Ar}/^{39}\text{Ar}$  step-heating biotite spectra. The data for aliquots 1 and 2 are shown in black and grey, respectively.

***Superior craton (south of CSB)***

---

**Sample Number:** GV-249-73

**Lithology:** Granodiorite

**Mineral analyzed:** Biotite

**Age:**  $1743 \pm 11$  Ma

**Interpretation:** Cooling age

**Location:**

**Lat:** 61.25591

**Long:** -75.16775

**Results:** Step heating of biotite produced a gas release spectrum with a “climbing staircase” pattern in early steps (~10% of  $^{39}\text{Ar}$  released), suggesting Ar loss, followed by homogeneous steps defining a plateau age of  $1743 \pm 11$  Ma, which is interpreted as the cooling age of biotite.

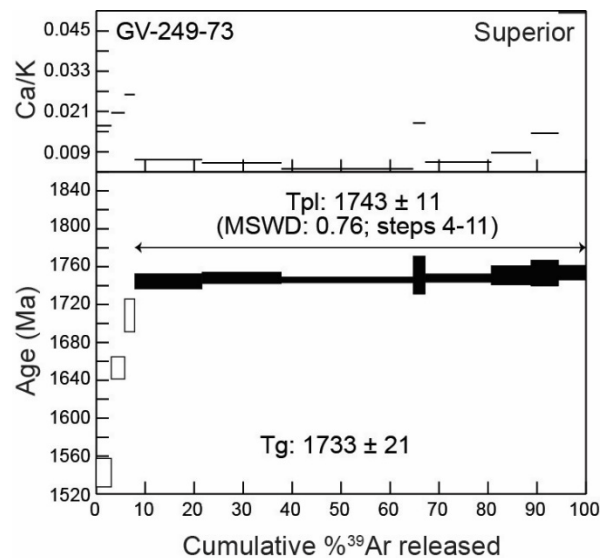

Figure S40:  $^{40}\text{Ar}/^{39}\text{Ar}$  step-heating biotite spectrum.

## *Superior craton (south of CSB)*

---

**Sample Number:** MW-123-63

**Lithology:** Granite gneiss

**Mineral analyzed:** Biotite

**Age:**  $2311 \pm 15$  Ma

**Interpretation:** Partial resetting

**Location:**

**Lat:** 60.29463

**Long:** -75.01648

**Results:** Step heating of biotite produced a gas release spectrum with an overall upward-stepping pattern. The last half of the spectrum yielded a pseudoplateau age of  $2311 \pm 15$  Ma, which is younger than the Neoarchean metamorphism that affected the Superior craton, but significantly older than CSB cooling ages. We interpret the age to represent partial Ar resetting of Archean biotite during CSB metamorphism (refer to manuscript for detailed discussion).

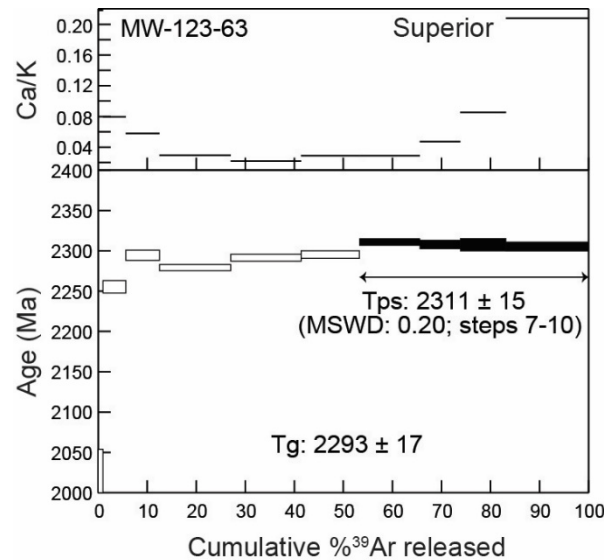

Figure S41:  $^{40}\text{Ar}/^{39}\text{Ar}$  step-heating biotite spectrum.

***Superior craton (south of CSB)***

---

**Sample Number:** MW-63-132(2)

**Lithology:** Granite gneiss

**Mineral analyzed:** Hornblende

**Age:** NO AGE

**Interpretation:** N/A

**Location:**

**Lat:** 60.3971

**Long:** -75.34259

**Results:** Two aliquots of hornblende both produced heterogeneous step-heating spectra, with neither aliquot attaining a plateau age. Both aliquots exhibit overall downward-stepping patterns, suggesting an excess Ar component. No age interpretation is made for this sample.

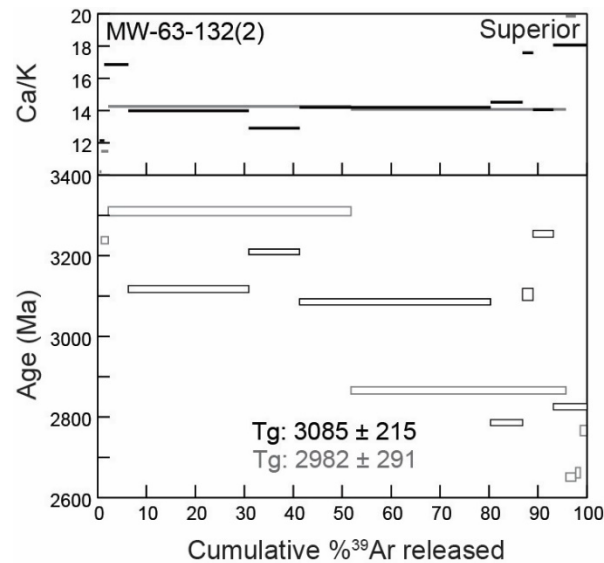

Figure S42: <sup>40</sup>Ar/<sup>39</sup>Ar step-heating hornblende spectra. The data for aliquots 1 and 2 are shown in black and grey, respectively.

### *Superior craton (south of CSB)*

---

**Sample Number:** MW-63-153

**Lithology:** Granodiorite

**Mineral analyzed:** Biotite

**Age:**  $2532 \pm 15$  Ma

**Interpretation:** Cooling age / partial resetting

**Location:**

**Lat:** 60.56033

**Long:** -75.04738

**Results:** Step heating of biotite yielded a relatively homogeneous gas release spectrum with a plateau age of  $2532 \pm 15$  Ma. This age is consistent with biotite cooling ages following Neoproterozoic metamorphism, undisturbed by CSB tectonism (see manuscript for details). However, it is significantly older than nearby biotite dates in the Superior craton, which we interpret to have been partially reset during CSB tectonism. It may reflect a minor degree of partial Ar resetting that occurred during CSB metamorphism (refer to manuscript for detailed discussion).

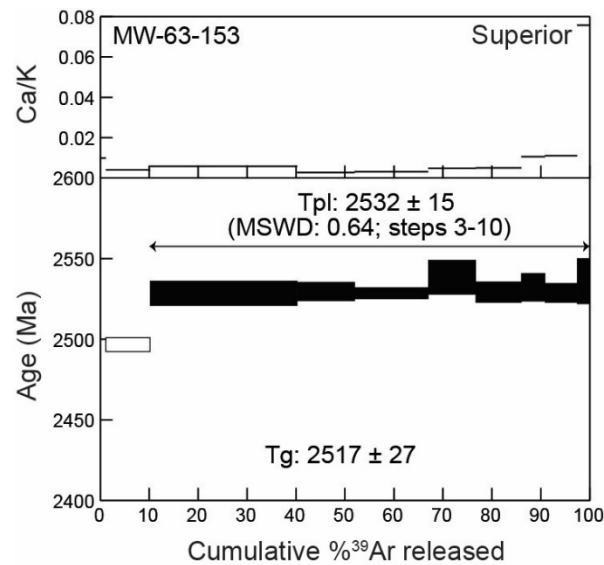

Figure S43:  $^{40}\text{Ar}/^{39}\text{Ar}$  step-heating biotite spectrum.



***Superior craton (south of CSB)***

---

**Sample Number:** MW-63-153

**Lithology:** Granodiorite

**Mineral analyzed:** Hornblende

**Age:**  $2704 \pm 17$  Ma

**Interpretation:** Crystallization or cooling age

**Location:**

**Lat:** 60.56033

**Long:** -75.04738

**Results:** Step heating of hornblende yielded a plateau age of  $2704 \pm 17$  Ma. The age may represent the timing of hornblende crystallization during the ca. 2702 Ma metamorphism that affected the Superior craton. Alternatively, it may be the cooling age of hornblende following metamorphism.

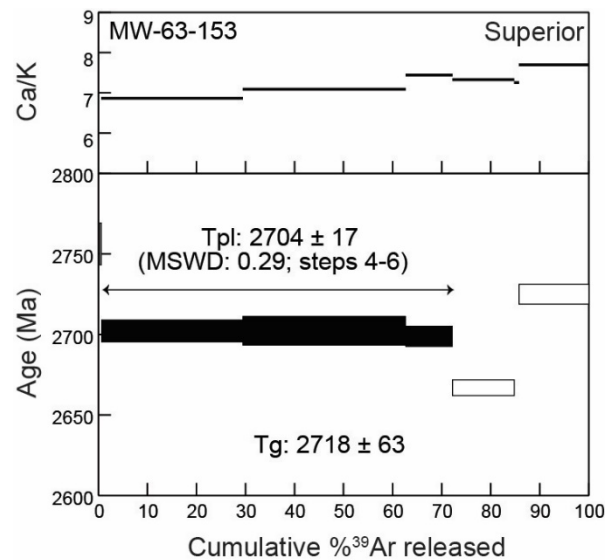

Figure S44:  $^{40}\text{Ar}/^{39}\text{Ar}$  step-heating hornblende spectrum.

**Sample Number:** TA-63-156

**Lithology:** Granite

**Mineral analyzed:** Biotite

**Age:**  $2223 \pm 17$  Ma

**Interpretation:** Partial resetting

**Location:**

**Lat:** 60.73264

**Long:** -75.26814

**Results:** Step heating of two aliquots of biotite yielded gas release spectra with young early steps, and the first aliquot produced a hump-shaped spectrum. The first aliquot yielded a plateau age of  $2322 \pm 14$  Ma (MSWD = 0.23; 51% of total  $^{39}\text{Ar}$  released). As no plateau age was attained from aliquot 2, a pseudoplateau age was calculated from the middle steps, which represent the flattest portion of the spectrum:  $2223 \pm 17$  Ma (MSWD = 7.2; 46% of total  $^{39}\text{Ar}$  released). The pseudoplateau age of  $2223 \pm 17$  Ma (from aliquot 2) is considered the preferred age because the spectrum from aliquot 2 is more homogeneous overall than that of aliquot 1. Additionally, the hump-shaped spectrum of aliquot 1 is indicative of compounded excess Ar and Ar loss, and the final steps of aliquot 1 approach the pseudoplateau age of aliquot 2. The preferred age of  $2223 \pm 17$  Ma is significantly younger than the Neoarchean metamorphism that affected the Superior craton, but significantly older than CSB cooling ages and nearby biotite dates in the Superior craton. We interpret the age to represent partial Ar resetting of Archean biotite during CSB metamorphism (refer to manuscript for detailed discussion).

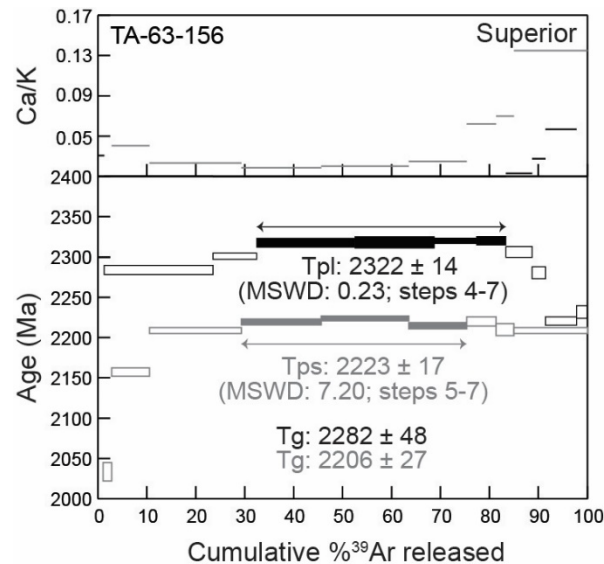

Figure S45:  $^{40}\text{Ar}/^{39}\text{Ar}$  step-heating biotite spectra. The data for aliquots 1 and 2 are shown in black and grey, respectively.

***Superior craton (south of CSB)***

---

**Sample Number:** TA-63-156

**Lithology:** Granite

**Mineral analyzed:** Hornblende

**Age:**  $2686 \pm 17$  Ma

**Interpretation:** Cooling age

**Location:**

**Lat:** 60.73264

**Long:** -75.26814

**Results:** Step heating of hornblende yielded a relatively homogeneous gas release spectrum with a plateau age of  $2686 \pm 17$  Ma, which is interpreted as the cooling age of hornblende.

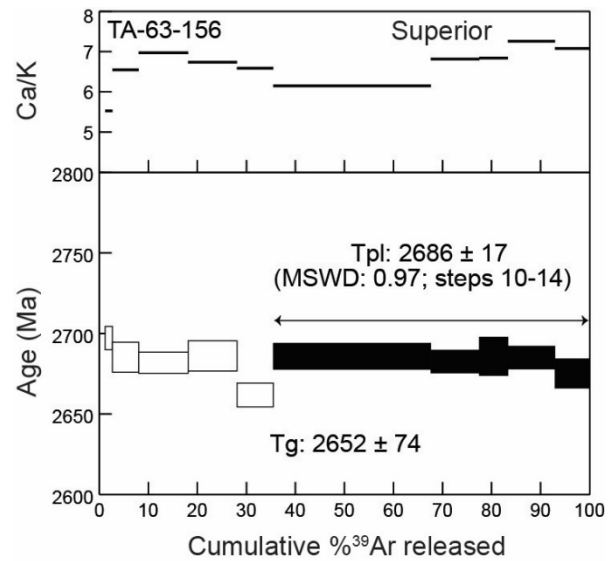

Figure S46:  $^{40}\text{Ar}/^{39}\text{Ar}$  step-heating hornblende spectrum.

***Superior craton (~450 km south of CSB)***

---

**Sample Number:** FA-61-105

**Lithology:** Granite

**Mineral analyzed:** Biotite

**Age:** NO AGE

**Interpretation:** N/A

**Location:**

**Lat:** 57.57023

**Long:** -70.32525

**Results:** Step heating of biotite yielded an upward-stepping gas-release pattern in the early steps, followed by a heterogeneous pattern. As such, no plateau age was attained, and no age is calculated for this sample.

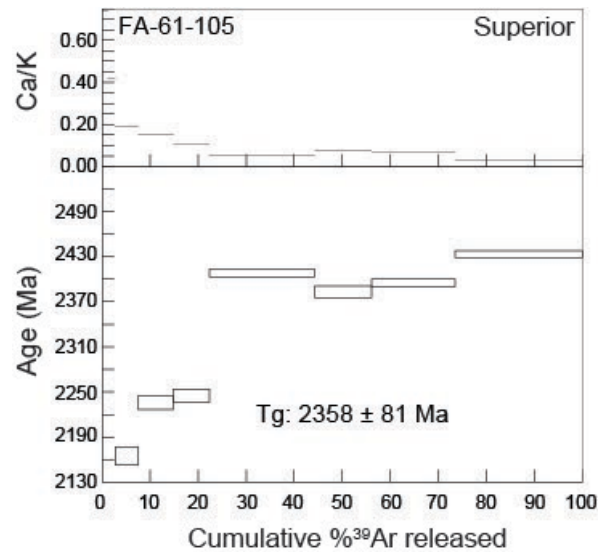

Figure S47: <sup>40</sup>Ar/<sup>39</sup>Ar step-heating biotite spectrum.

*Superior craton (~450 km south of CSB)*

---

**Sample Number:** R-61-75b

**Lithology:** Granite

**Mineral analyzed:** Biotite

**Age:**  $2401 \pm 15$  Ma

**Interpretation:** Cooling age

**Location:**

**Lat:** 57.54117

**Long:** -70.63295

**Results:** Step heating of biotite yielded a homogeneous gas-release pattern with a plateau age of  $2401 \pm 15$  Ma, which is interpreted as the cooling age of biotite.

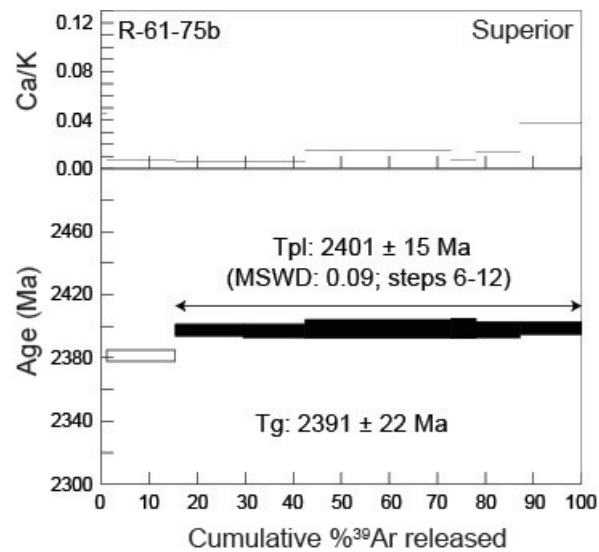

Figure S48:  $^{40}\text{Ar}/^{39}\text{Ar}$  step-heating biotite spectrum.

***Superior craton (~450 km south of CSB)***

---

**Sample Number:** R-61-75b

**Lithology:** Granite

**Mineral analyzed:** Hornblende

**Age:**  $2532 \pm 15$  Ma

**Interpretation:** Cooling age

**Location:**

**Lat:** 57.54117

**Long:** -70.63295

**Results:** Step heating of hornblende yielded a homogeneous gas-release pattern with a plateau age of  $2532 \pm 15$  Ma, interpreted as the cooling age of hornblende.

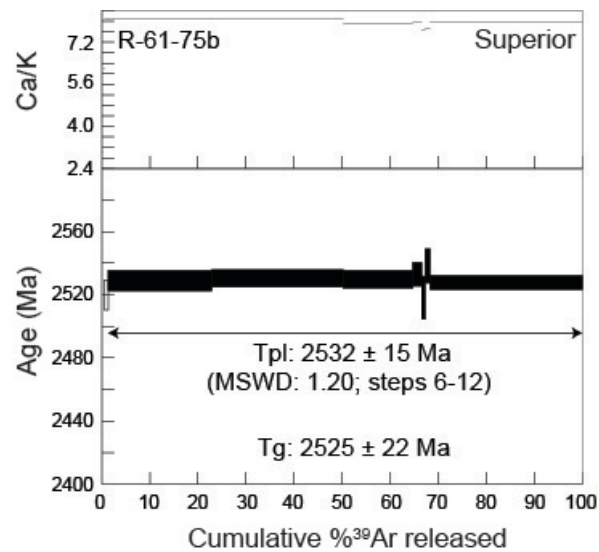

Figure S49:  $^{40}\text{Ar}/^{39}\text{Ar}$  step-heating hornblende spectrum.

***Superior craton (~450 km south of CSB)***

---

**Sample Number:** R-61-86

**Lithology:** Granulite gneiss

**Mineral analyzed:** Biotite

**Age:**  $2414 \pm 15$  Ma

**Interpretation:** Cooling age

**Location:**

**Lat:** 57.41912

**Long:** -71.13084

**Results:** Step heating of biotite yielded a homogeneous gas-release pattern with a plateau age of  $2414 \pm 15$  Ma, interpreted as the cooling age of biotite.

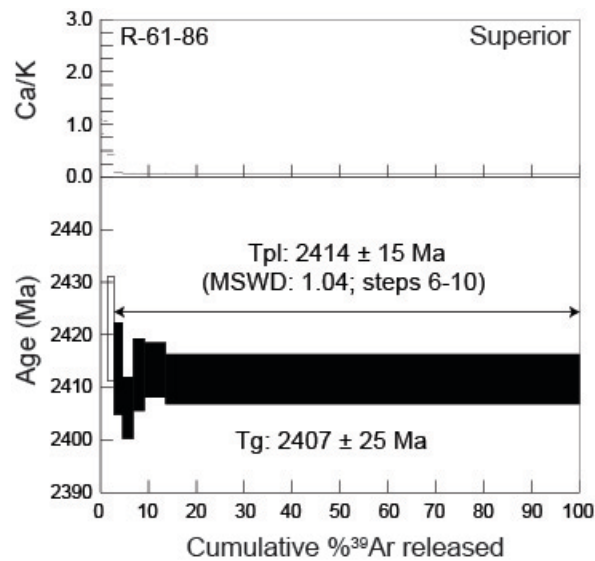

Figure S50:  $^{40}\text{Ar}/^{39}\text{Ar}$  step-heating biotite spectrum.

***Superior craton (~450 km south of CSB)***

---

**Sample Number:** SL-61-79

**Lithology:** Granite gneiss

**Mineral analyzed:** Biotite

**Age:**  $2439 \pm 15$  Ma

**Interpretation:** Cooling age

**Location:**

**Lat:** 57.56879

**Long:** -71.60984

**Results:** Step heating of biotite yielded an ascending gas-release pattern in the earliest steps, followed by a homogeneous pattern with a plateau age of  $2439 \pm 15$  Ma, interpreted as the cooling age of biotite.

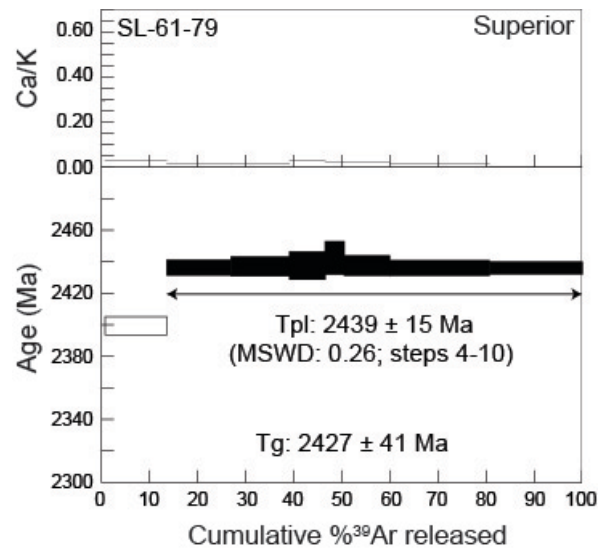

Figure S51:  $^{40}\text{Ar}/^{39}\text{Ar}$  step-heating biotite spectrum.



***Superior craton (~450 km south of CSB)***

---

**Sample Number:** SL-61-79

**Lithology:** Granite gneiss

**Mineral analyzed:** Hornblende

**Age:**  $2563 \pm 16$  Ma

**Interpretation:** Cooling age

**Location:**

**Lat:** 57.56879

**Long:** -71.60984

**Results:** Step heating of hornblende yielded a homogeneous gas-release pattern with a plateau age of  $2563 \pm 16$  Ma, interpreted as the cooling age of hornblende.

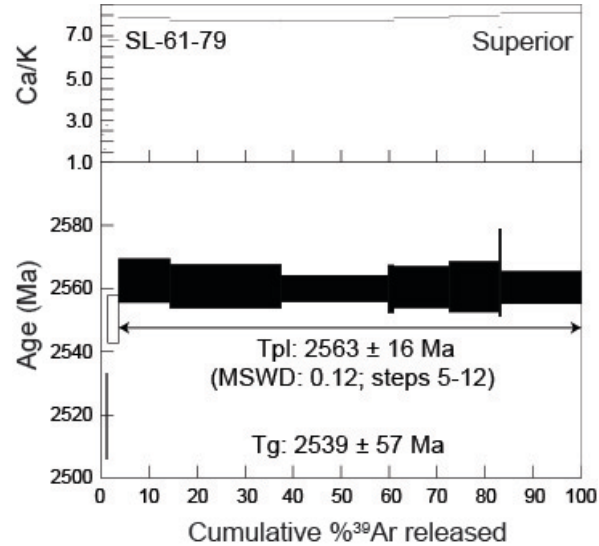

Figure S52: <sup>40</sup>Ar/<sup>39</sup>Ar step-heating hornblende spectrum.

***Superior craton (~450 km south of CSB)***

---

**Sample Number:** SL-61-86

**Lithology:** Granite gneiss

**Mineral analyzed:** Biotite

**Age:**  $2427 \pm 15$  Ma

**Interpretation:** Cooling age

**Location:**

**Lat:** 57.36542

**Long:** -71.76442

**Results:** Step heating of biotite yielded an upward-stepping gas-release pattern in the earliest steps, followed by a homogeneous pattern with a plateau age of  $2427 \pm 15$  Ma, interpreted as the cooling age of biotite.

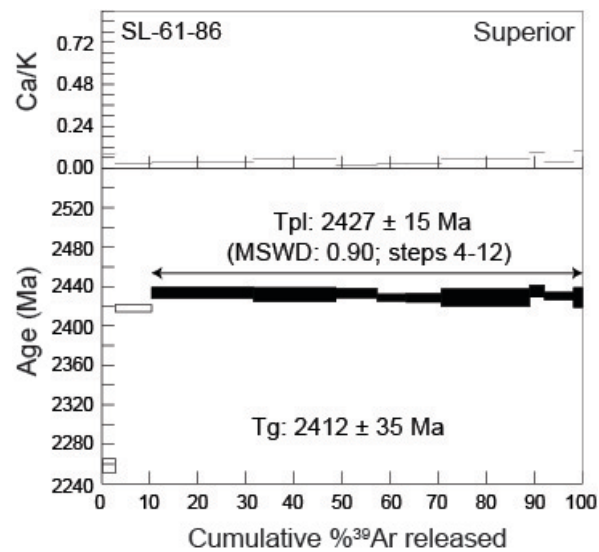

Figure S53:  $^{40}\text{Ar}/^{39}\text{Ar}$  step-heating biotite spectrum.

*Superior craton (~450 km south of CSB)*

---

**Sample Number:** SL-61-185

**Lithology:** Granite

**Mineral analyzed:** Biotite

**Age:**  $2462 \pm 15$  Ma

**Interpretation:** Cooling age

**Location:**

**Lat:** 57.45849

**Long:** -72.59088

**Results:** Step heating of biotite yielded a relatively homogeneous gas-release pattern with a plateau age of  $2462 \pm 15$  Ma, interpreted as the cooling age of biotite.

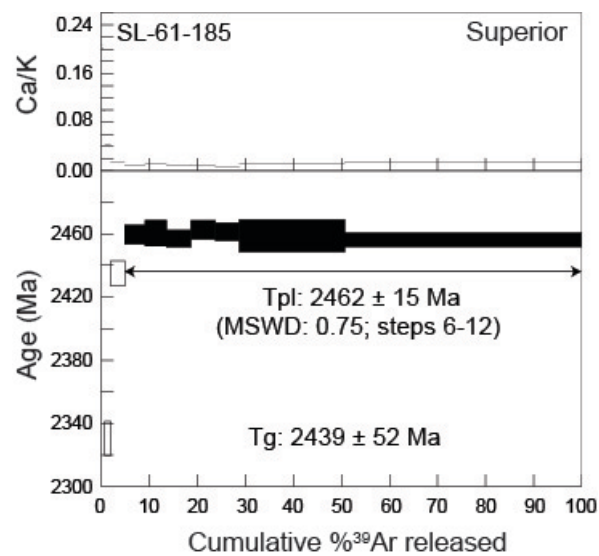

Figure S54:  $^{40}\text{Ar}/^{39}\text{Ar}$  step-heating biotite spectrum.

***Superior craton (~450 km south of CSB)***

---

**Sample Number:** SL-61-185

**Lithology:** Granite

**Mineral analyzed:** Hornblende

**Age:** NO AGE

**Interpretation:** N/A

**Location:**

**Lat:** 57.45849

**Long:** -72.59088

**Results:** Step-heating of hornblende yielded a downward-stepping, heterogeneous gas-release pattern. No age is interpreted for this sample.

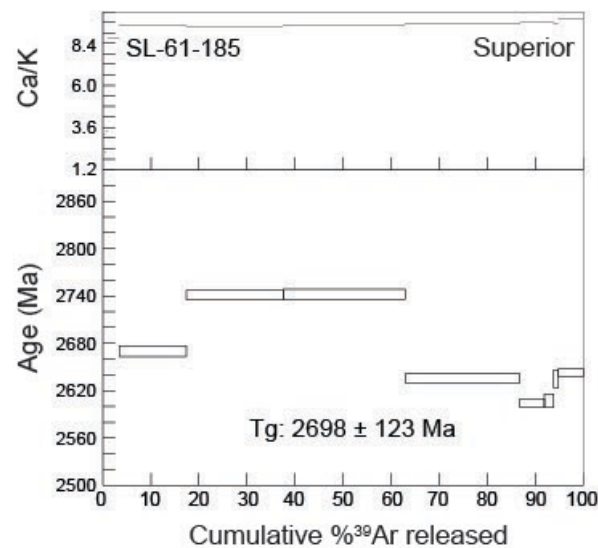

Figure S55:  $^{40}\text{Ar}/^{39}\text{Ar}$  step-heating hornblende spectrum.

## **References**

- Foland, K.A., 1983.  $^{40}\text{Ar}/^{39}\text{Ar}$  incremental heating plateaus for biotites with excess argon. *Isotope Geoscience* 1 (1), 3–21.
- Jourdan, F., Verati, C., Férand, G., 2006. Intercalibration of the Hb3gr  $^{40}\text{Ar}/^{39}\text{Ar}$  dating standard. *Chemical Geology* 231, 177–189.
- Kellett, D., Joyce, N., 2014. Analytical details of single- and multi-collection  $^{40}\text{Ar}/^{39}\text{Ar}$  measurements for conventional step-heating and total fusion age calculation using the Nu Noblesse at the Geological Survey of Canada; Geological Survey of Canada, Technical Note 8, 27 p.
- Kelley, S., 2002. Excess argon in K–Ar and Ar–Ar geochronology. *Chemical Geology* 188(1-2), 1–22.
- Ludwig, K.R., 2003. Isoplot 4.15: A geochronological toolkit for Microsoft Excel. Berkeley Geochronology Center Special Publication No. 4., 76 pp.
- McDougall, I., Harrison, T.M., 1999. *Geochronology and Thermochronology by the  $^{40}\text{Ar}/^{39}\text{Ar}$  method*. Second edition, Oxford University Press, New York, NY, 269 p.
- Mercer, C.M., Hodges, K.V., 2016. ArAR – A software tool to promote the robust comparison of K–Ar and  $^{40}\text{Ar}/^{39}\text{Ar}$  dates published using different decay, isotopic, and monitor-age parameters. *Chemical Geology* 440, 148–163.
- Pankhurst, R.J., Moorbath, S., Rex, D.C., Turner, G., 1973. Mineral age patterns in ca. 3700 my old rocks from West Greenland. *Earth and Planetary Science Letters* 20, 157–170.
- Roddick, J.C. 1983. High precision intercalibration of  $^{40}\text{Ar}$ – $^{39}\text{Ar}$  standards. *Geochimica et Cosmochimica Acta* 47, 887–898.
- Roddick, J.C., 1988. The assessment of errors in  $^{40}\text{Ar}/^{39}\text{Ar}$  Dating; *in Radiogenic Age and Isotopic Studies: Report 2*, Geological Survey of Canada, Paper 88-2, p. 3–8.
- Roddick, J.C., Cliff, R.A., Rex, D.C., 1980. The evolution of excess argon in alpine biotites – a  $^{40}\text{Ar}$ – $^{39}\text{Ar}$  analysis. *Earth and Planetary Science Letters* 48, 185–208.
- Scaillet, S., 2000. Numerical error analysis in  $^{40}\text{Ar}/^{39}\text{Ar}$  dating. *Chemical Geology* 162(3-4), 269–298.
- Skipton, D.R., Warren, C.J., Hanke, F.H., 2018. Numerical models of P-T, time and grain-size controls on Ar diffusion in biotite: An aide to interpreting  $^{40}\text{Ar}/^{39}\text{Ar}$  ages. *Chemical Geology* 496, 14–24.

- Smye, A.J., Warren, C.J., Bickle, M.J., 2013. The signature of devolatilisation: extraneous  $^{40}\text{Ar}$  systematics in high-pressure metamorphic rocks. *Geochimica et Cosmochimica Acta* 113, 94–112.
- Steiger, R.H., Jäger, E., 1977. Subcommittee on geochronology: convention on the use of decay constants in geo- and cosmochronology. *Earth and Planetary Science Letters* 36, 359–362.
- Villeneuve, M.E., MacIntyre, D.G., 1997. Laser  $^{40}\text{Ar}/^{39}\text{Ar}$  ages of the Babine porphyries and Newman Volcanics, Fulton Lake map area, west-central British Columbia; *in* Radiogenic age and isotopic studies: Report 10, Geological Survey of Canada, Current Research 1997-F, p. 131–139.
- Villeneuve, M., Sandeman, H., Davis, W.J., 2000. A method for intercalibration of U-Th-Pb and  $^{40}\text{Ar}$ - $^{39}\text{Ar}$  ages in the Phanerozoic. *Geochimica et Cosmochimica Acta* 64(23), 4017–4030.
- Warren, C.J., Hanke, F.H., Kelley, S.P., 2012. When can muscovite  $^{40}\text{Ar}/^{39}\text{Ar}$  dating constrain the timing of metamorphic exhumation? *Chemical Geology* 291, 79–86.
